# Supplementary material for: Oxidative functionalization of aliphatic and aromatic amino acid derivatives with H2O2 catalyzed by a nonheme imine based iron complex
Source: Royal Society of Chemistry journal article supplement (doi:10.1039/c8ra02879f), 2018-01-01
Supplement: c8ra02879f1.pdf [file c8ra02879f1.pdf]

## Electronic Supplementary Information

# Oxidative Functionalization of Aliphatic and Aromatic Amino Acid Derivatives with H<sub>2</sub>O<sub>2</sub> Catalyzed by a Nonheme Imine Based Iron Complex

Barbara Ticconi,<sup>a</sup> Arianna Colcerasa,<sup>a</sup> Stefano Di Stefano,<sup>a</sup> Osvaldo Lanzalunga,<sup>a\*</sup> Andrea Lapi,<sup>a</sup> Marco Mazzonna<sup>a</sup> and Giorgio Olivo<sup>b</sup>

<sup>a</sup> Dipartimento di Chimica, Università degli Studi di Roma “La Sapienza” and Istituto CNR di Metodologie Chimiche (IMC-CNR), Sezione Meccanismi di Reazione, c/o Dipartimento di Chimica, Università degli Studi di Roma “La Sapienza”, P.le A. Moro 5, I-00185 Rome, Italy; Phone: +390649913711; Fax: +390649913629; Email: osvaldo.lanzalunga@uniroma1.it

<sup>b</sup> Institut de Química Computacional i Catàlisi (IQCC) and Departament de Química, Universitat de Girona, Campus de Montilivi, 17071 Girona, Spain.

## Content

|                                                                                                                                                                            |    |
|----------------------------------------------------------------------------------------------------------------------------------------------------------------------------|----|
| 1. Characterization data of <i>N</i> -acetyl amino acids methyl esters (2-8)                                                                                               | 2  |
| 2. GC-MS (EI, 70 eV) and <sup>1</sup> H NMR analyses of the oxidation of <i>N</i> -acetyl amino acids methyl esters (2-8) with the 1/H <sub>2</sub> O <sub>2</sub> system. | 13 |
| 3. Characterization data of the new product (2 <i>S</i> )- <i>N</i> -acetyl- <i>o</i> -hydroxyphenylalanine methyl ester                                                   | 27 |
| 4. References                                                                                                                                                              | 29 |

*N*-AcAlaOMe (2)<sup>1</sup>

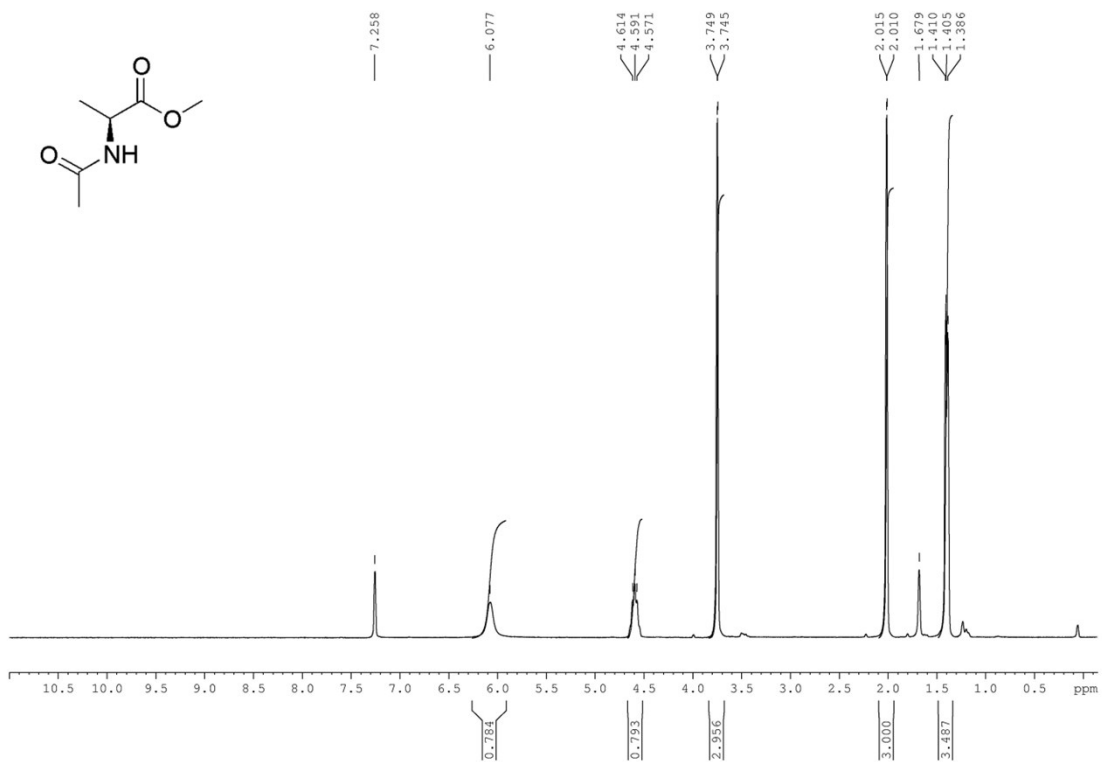

CDCl<sub>3</sub> (300 MHz)

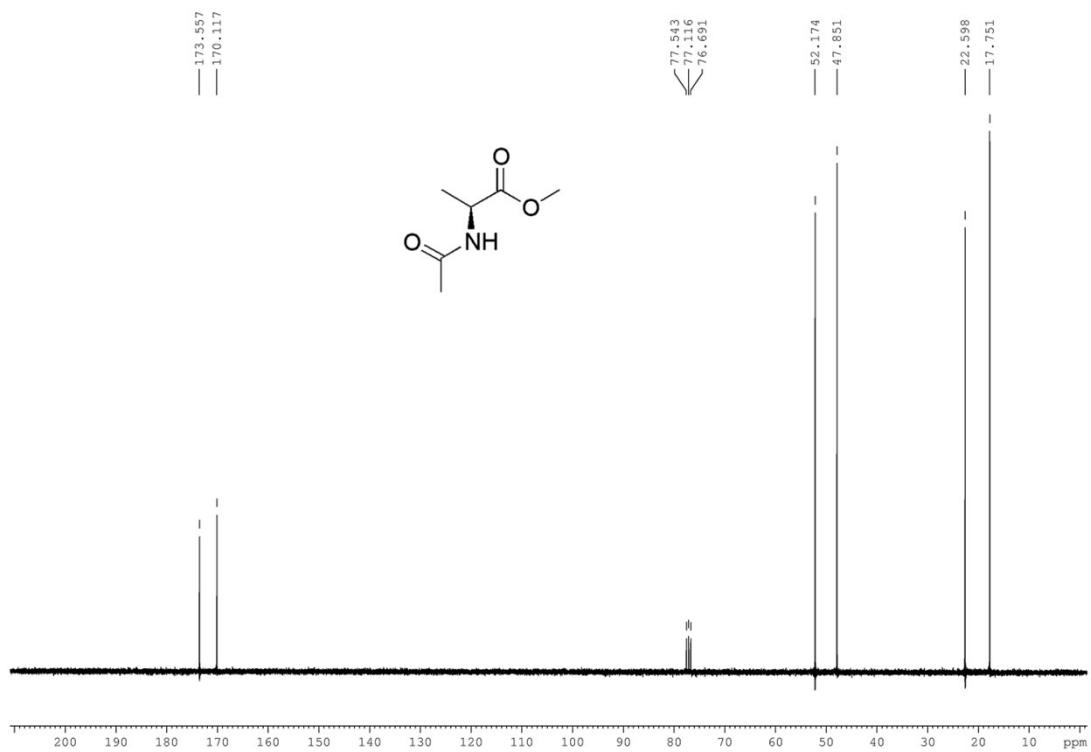

CDCl<sub>3</sub> (75 MHz)

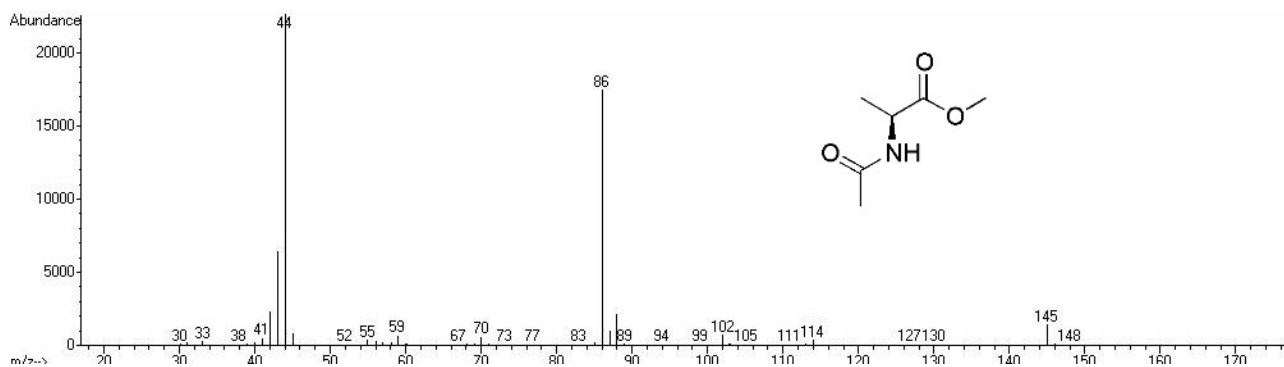

*N*-AcValOMe (3)<sup>1</sup>

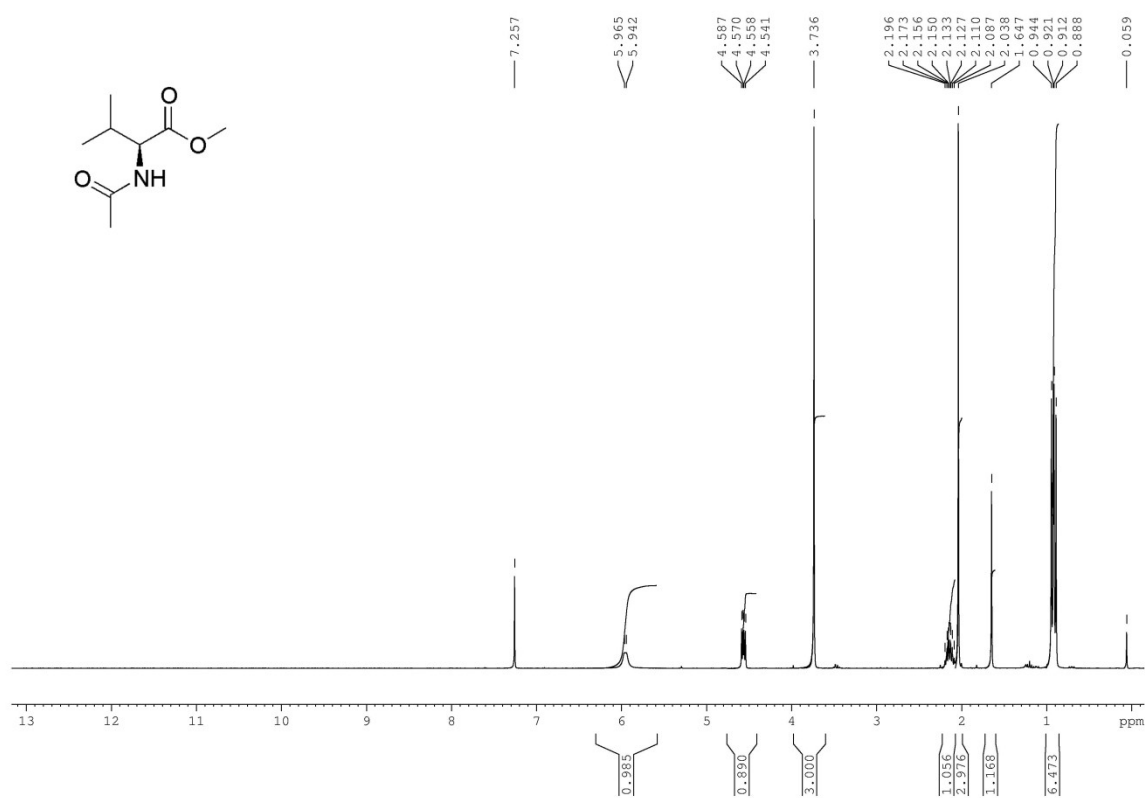

CDCl<sub>3</sub> (300 MHz)

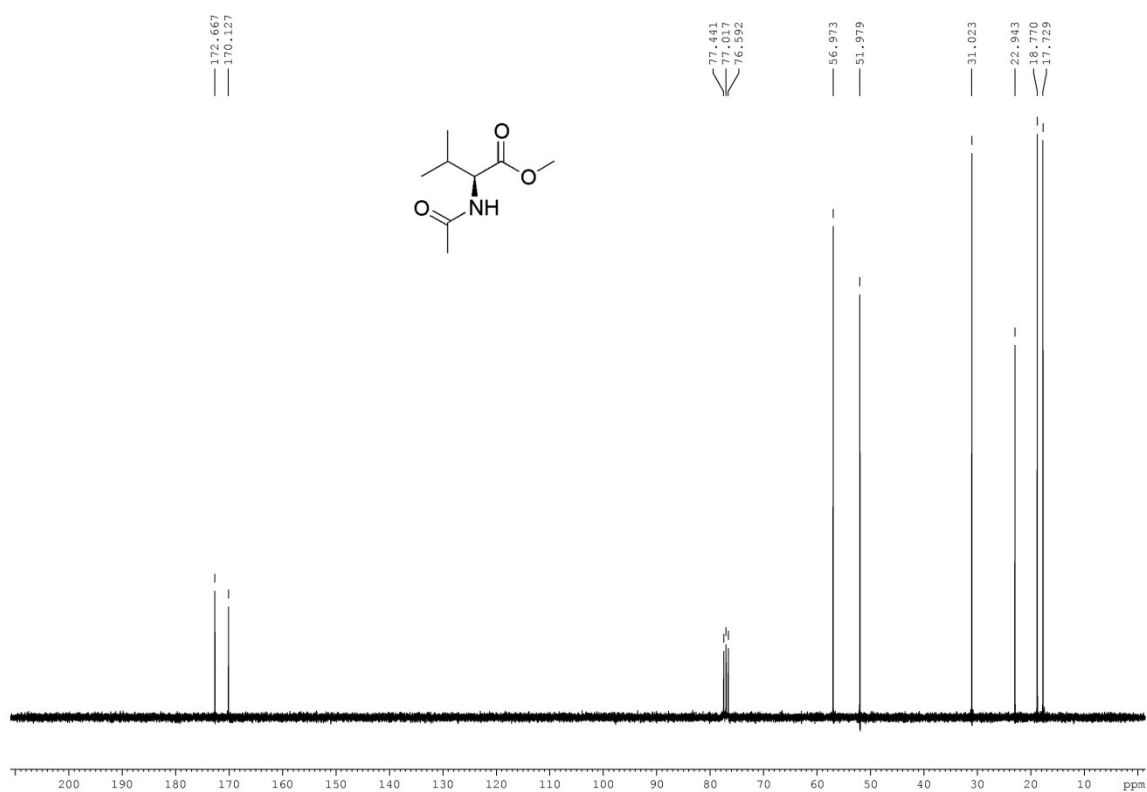

CDCl<sub>3</sub> (75 MHz)

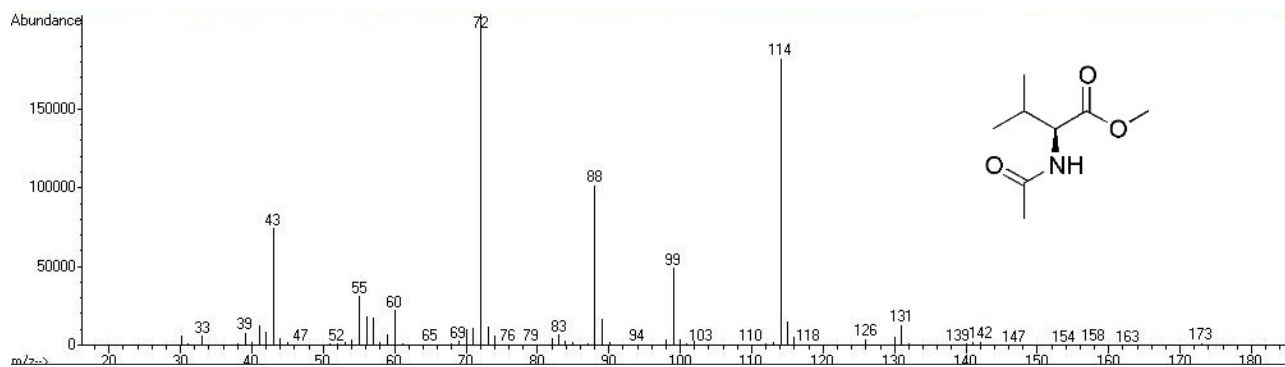

*N*-AcLeuOMe (4)<sup>1</sup>

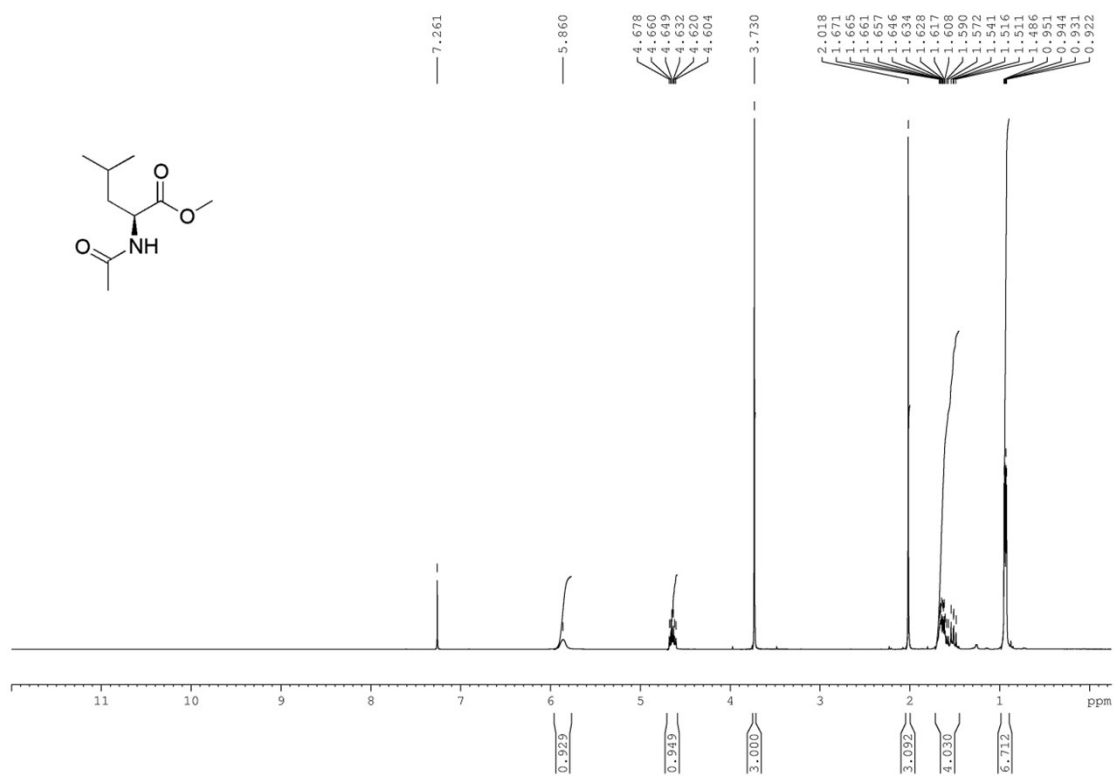

CDCl<sub>3</sub> (300 MHz)

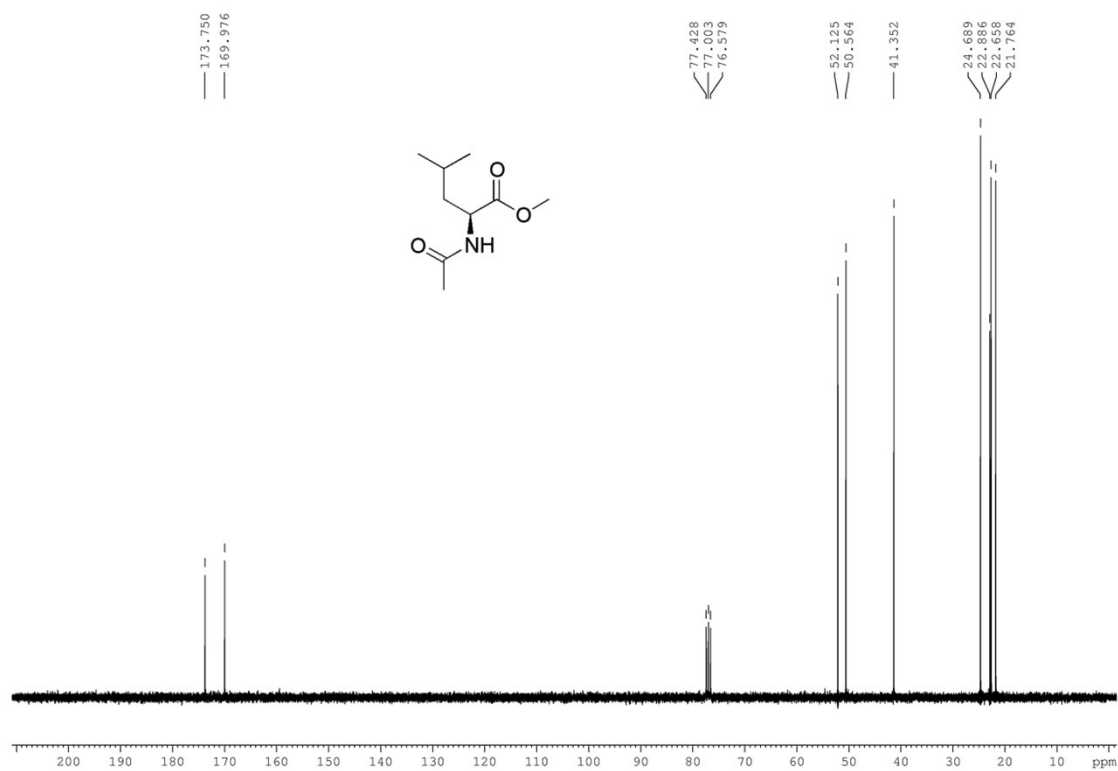

CDCl<sub>3</sub> (75 MHz)

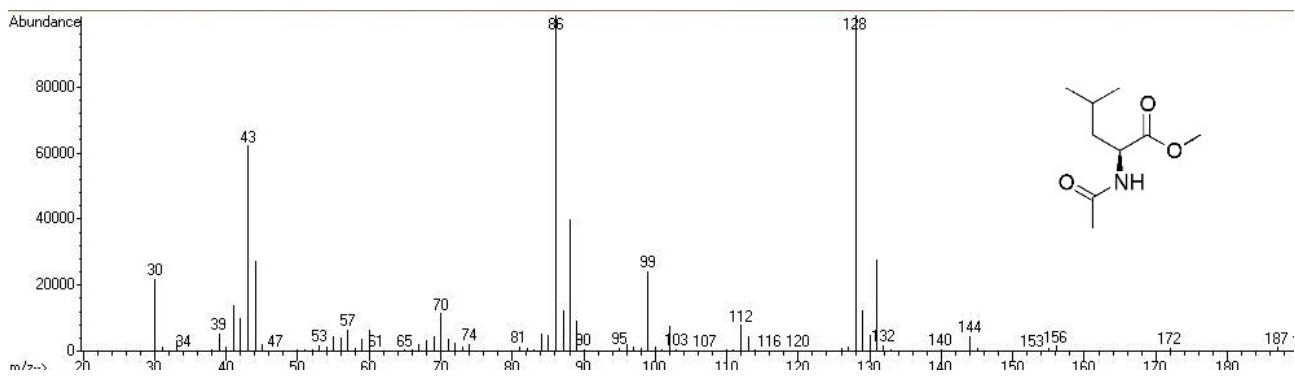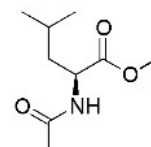

*N*-AcProMe (5)<sup>2,3</sup>

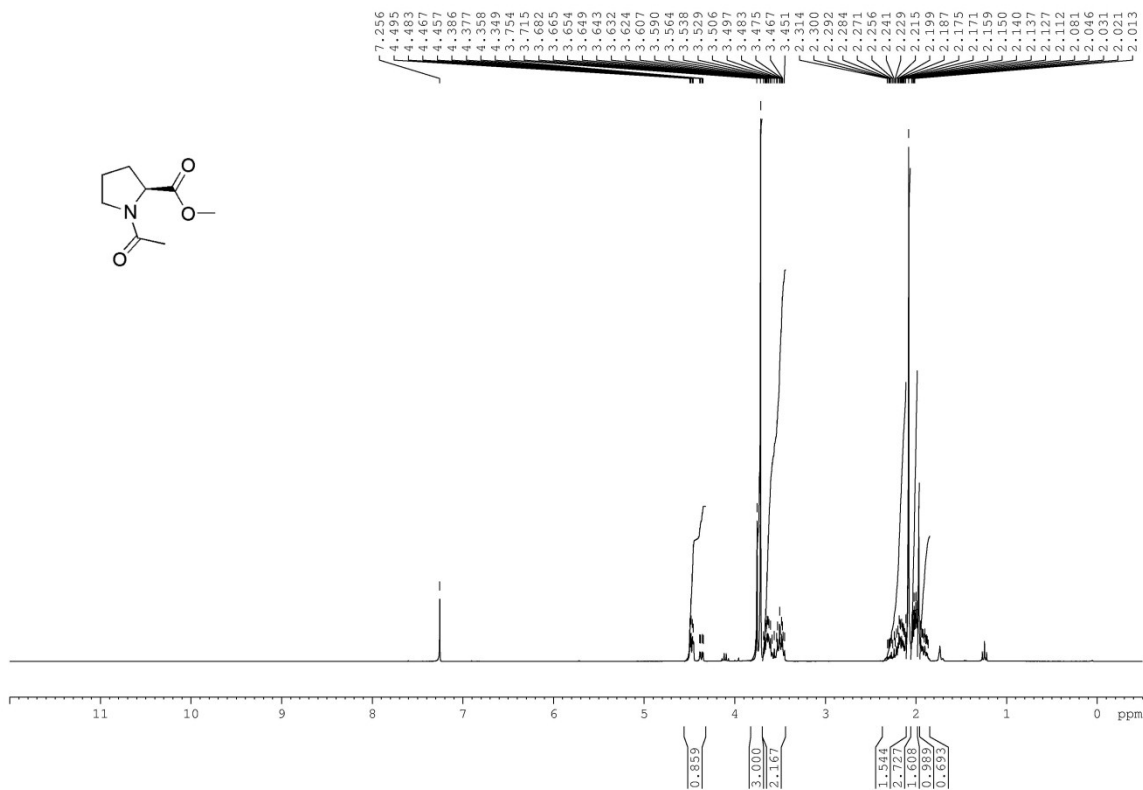

CDCl<sub>3</sub> (300 MHz)

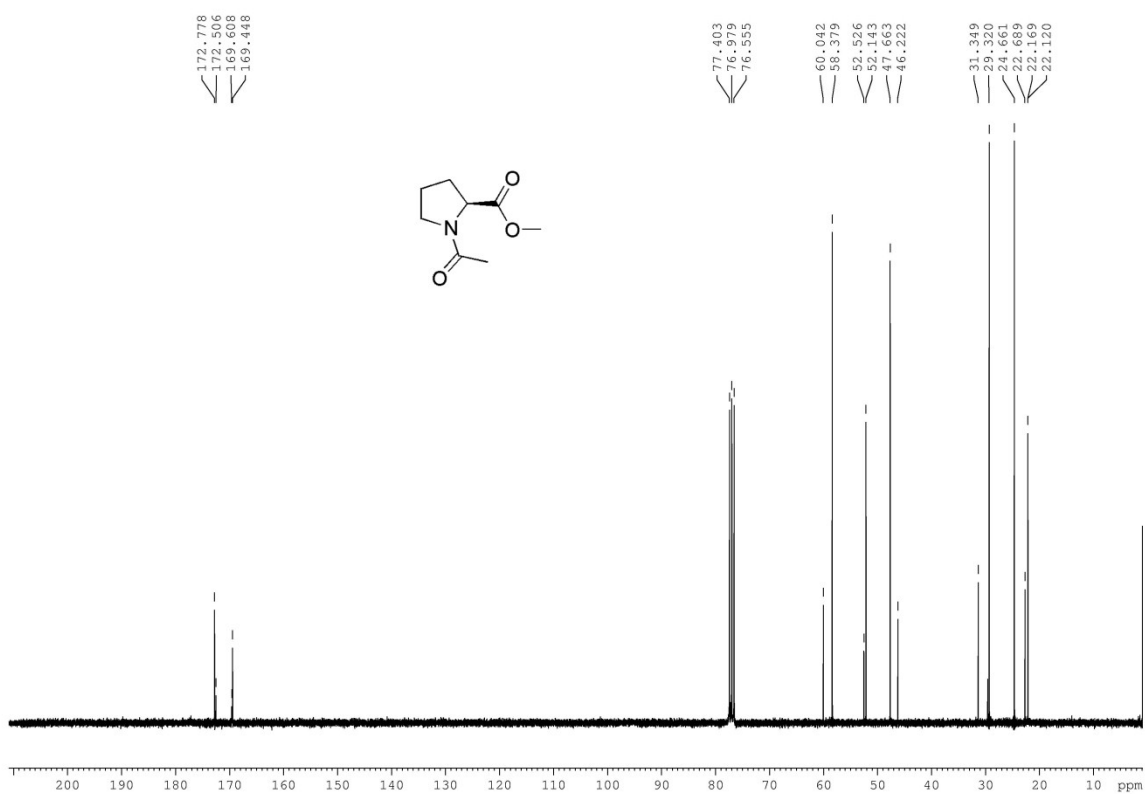

CDCl<sub>3</sub> (75 MHz)

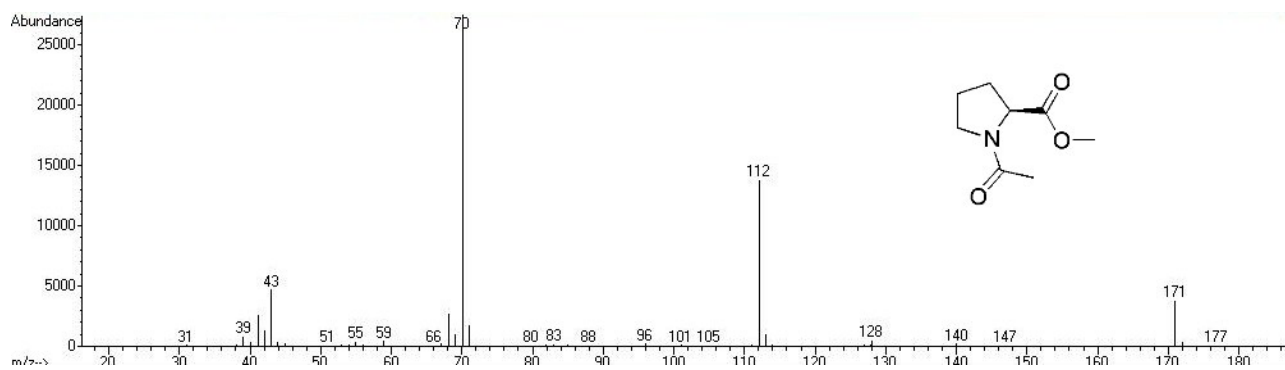

*N*-AcTrpOMe (6)<sup>4-6</sup>

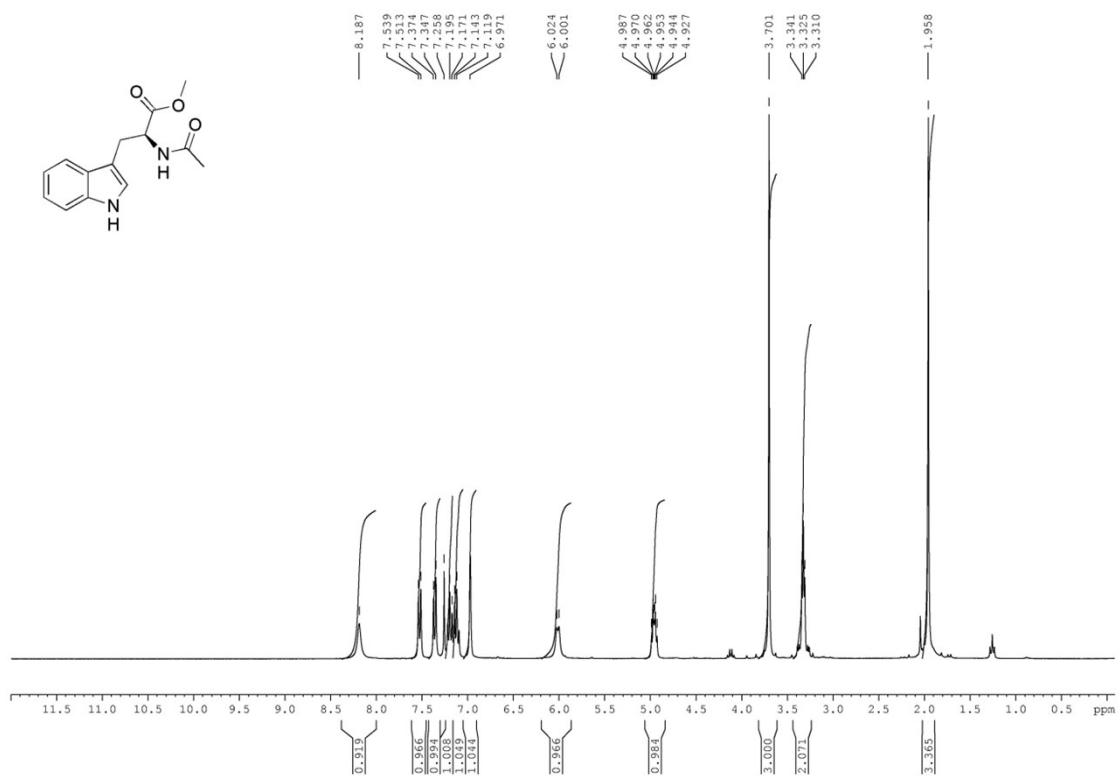

CDCl<sub>3</sub> (300 MHz)

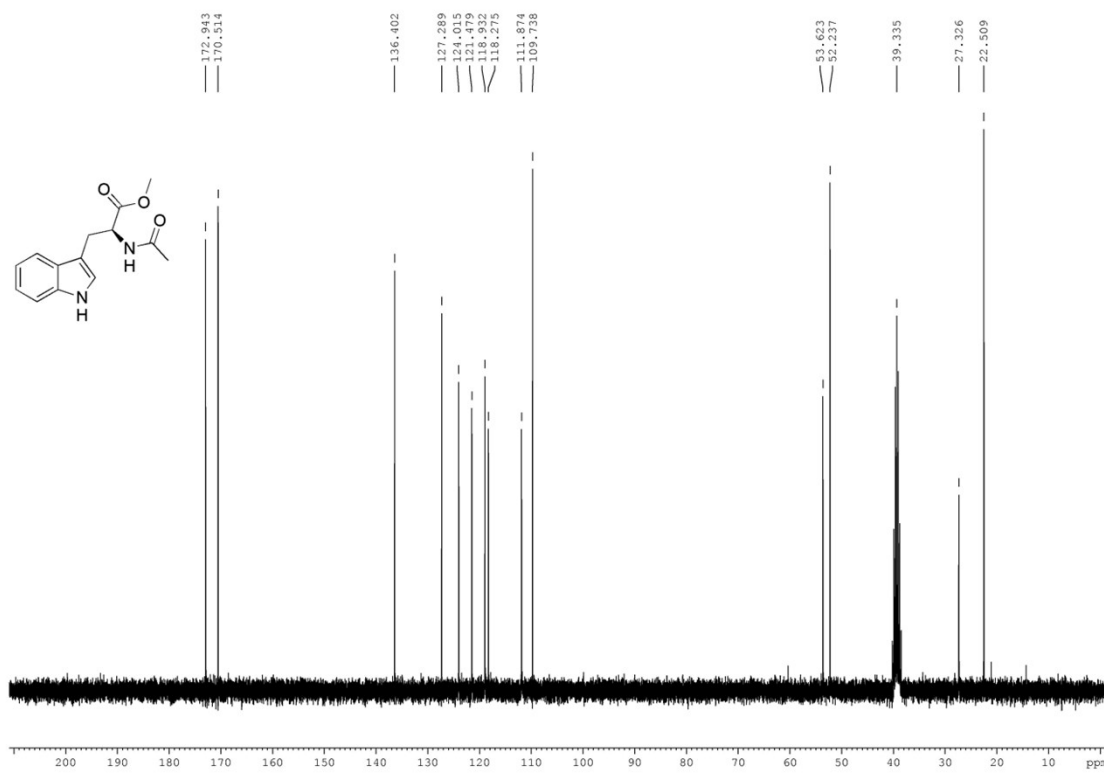

DMSO-*d*<sub>6</sub> (75 MHz)



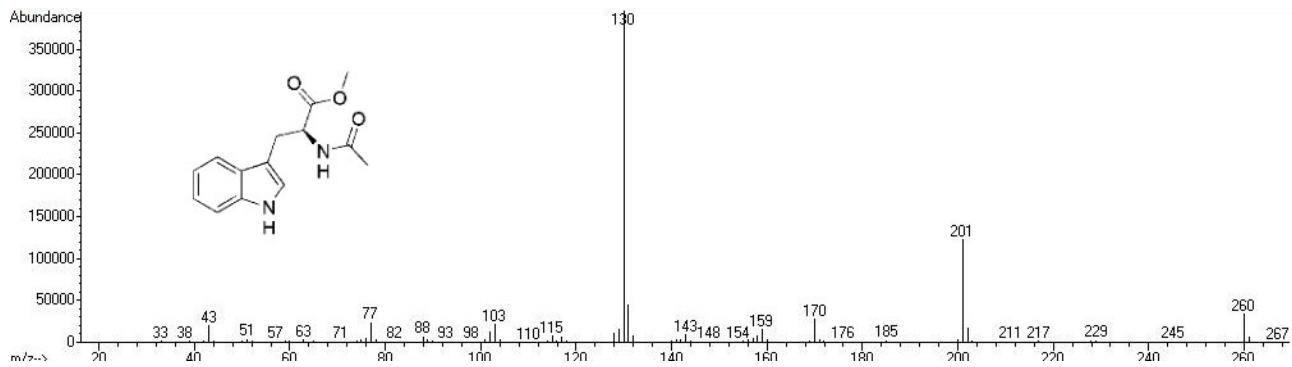

*N*-AcPheOMe (7)<sup>1</sup>

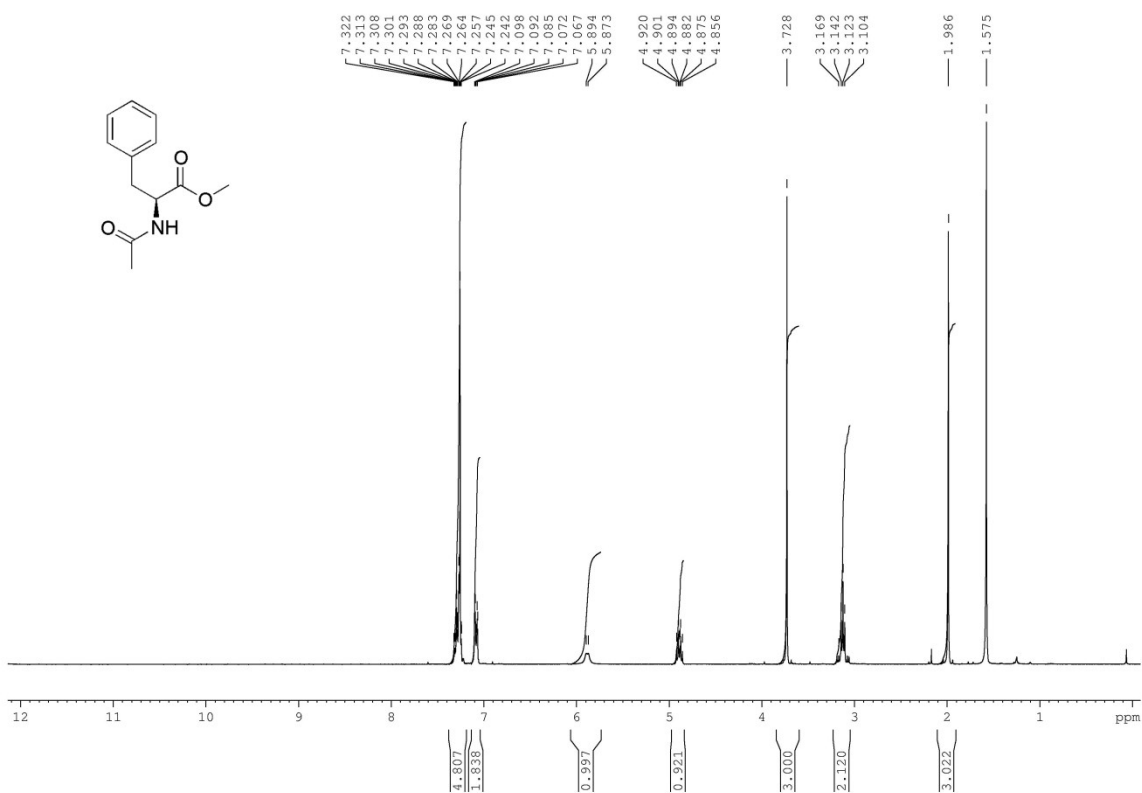

CDCl<sub>3</sub> (300 MHz)

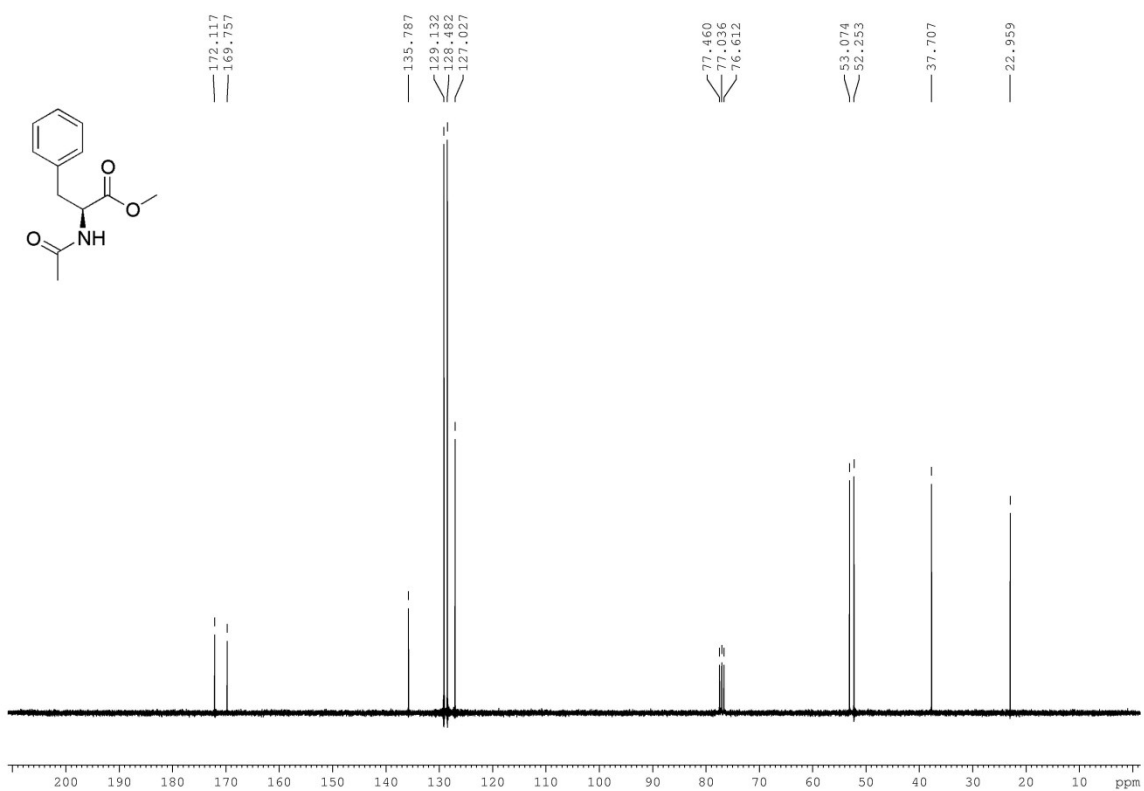

CDCl<sub>3</sub> (75 MHz)

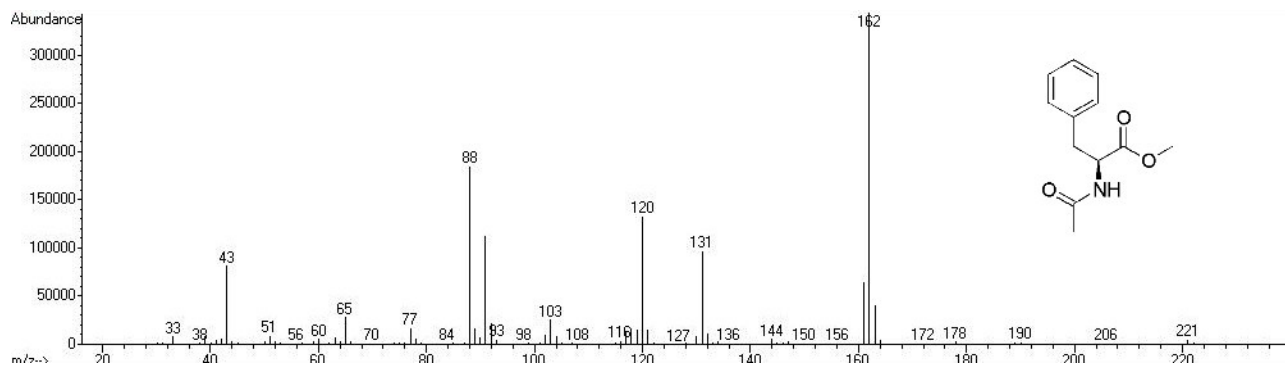

*N*-AcTyrOMe (**8**)<sup>7</sup>

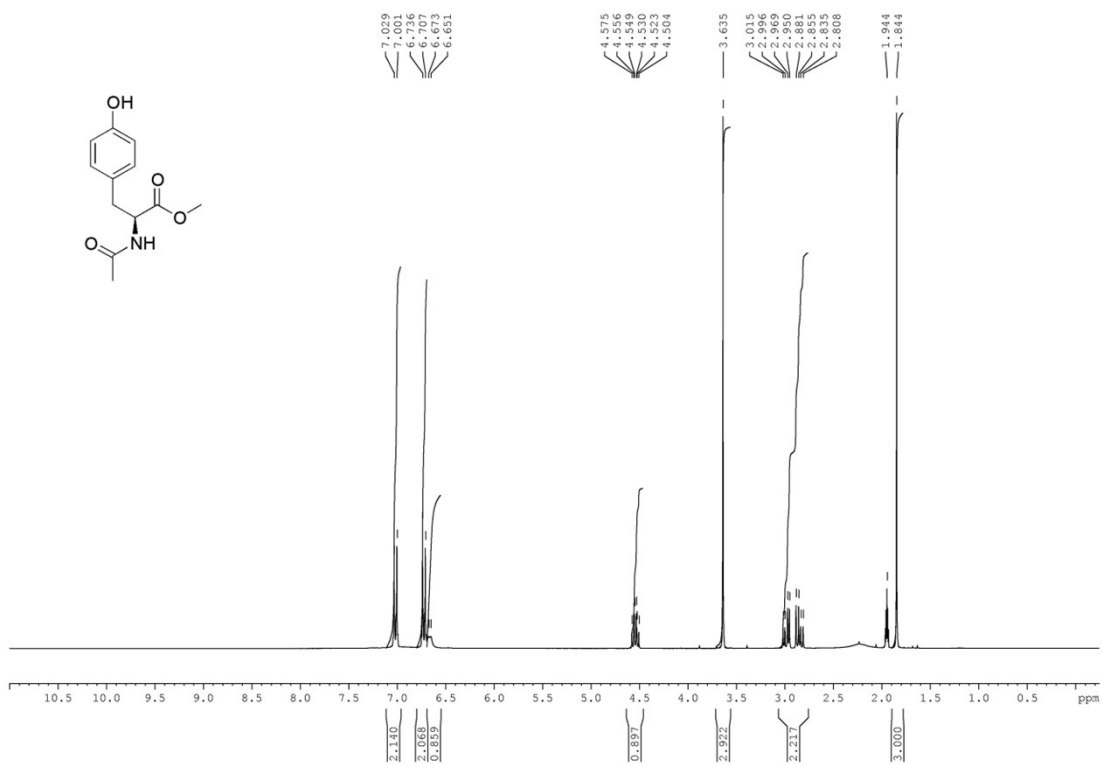

$CD_3CN$  (300 MHz)

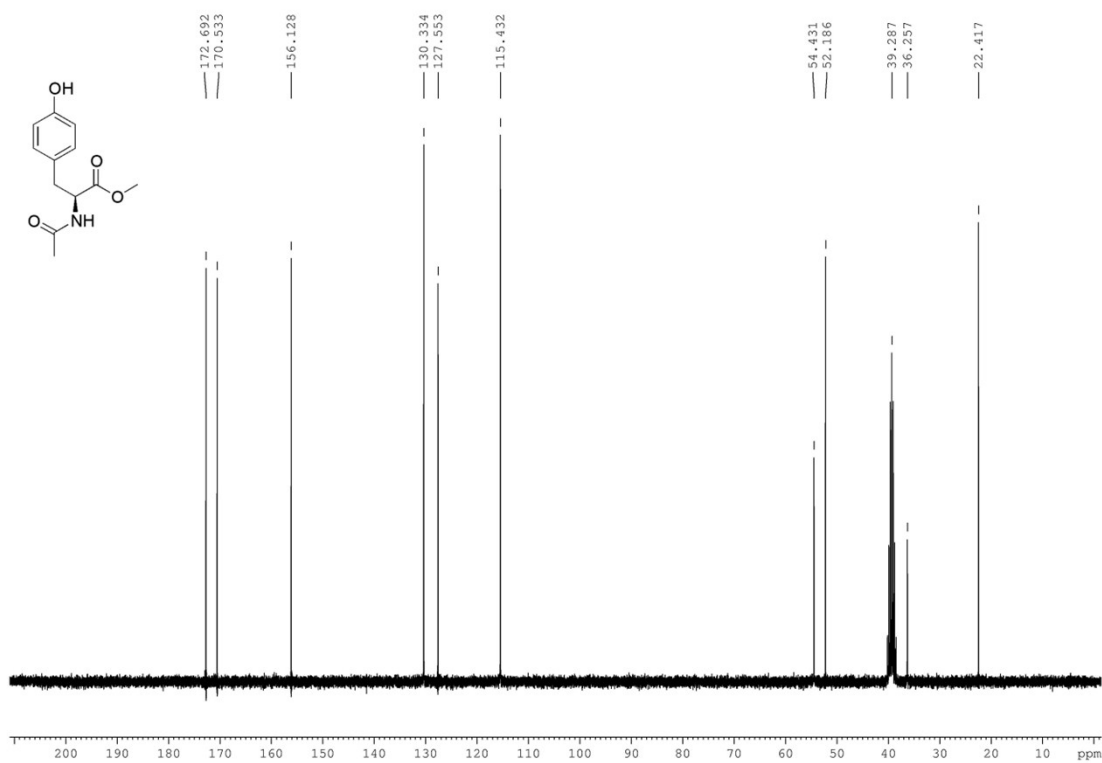

$DMSO-d_6$  (75 MHz)

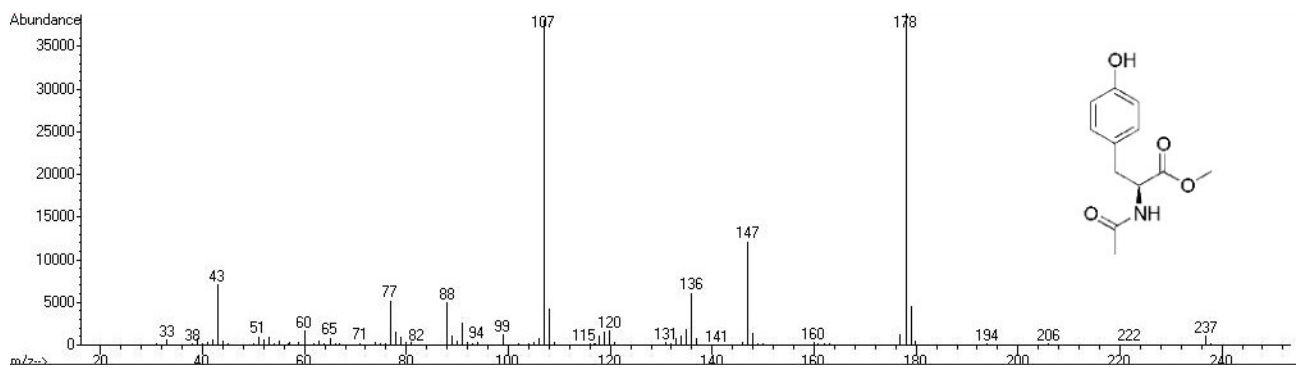

# Oxidation of *N*-AcAlaOMe (2) with the 1/H<sub>2</sub>O<sub>2</sub> system

See ref. [8] for product identification

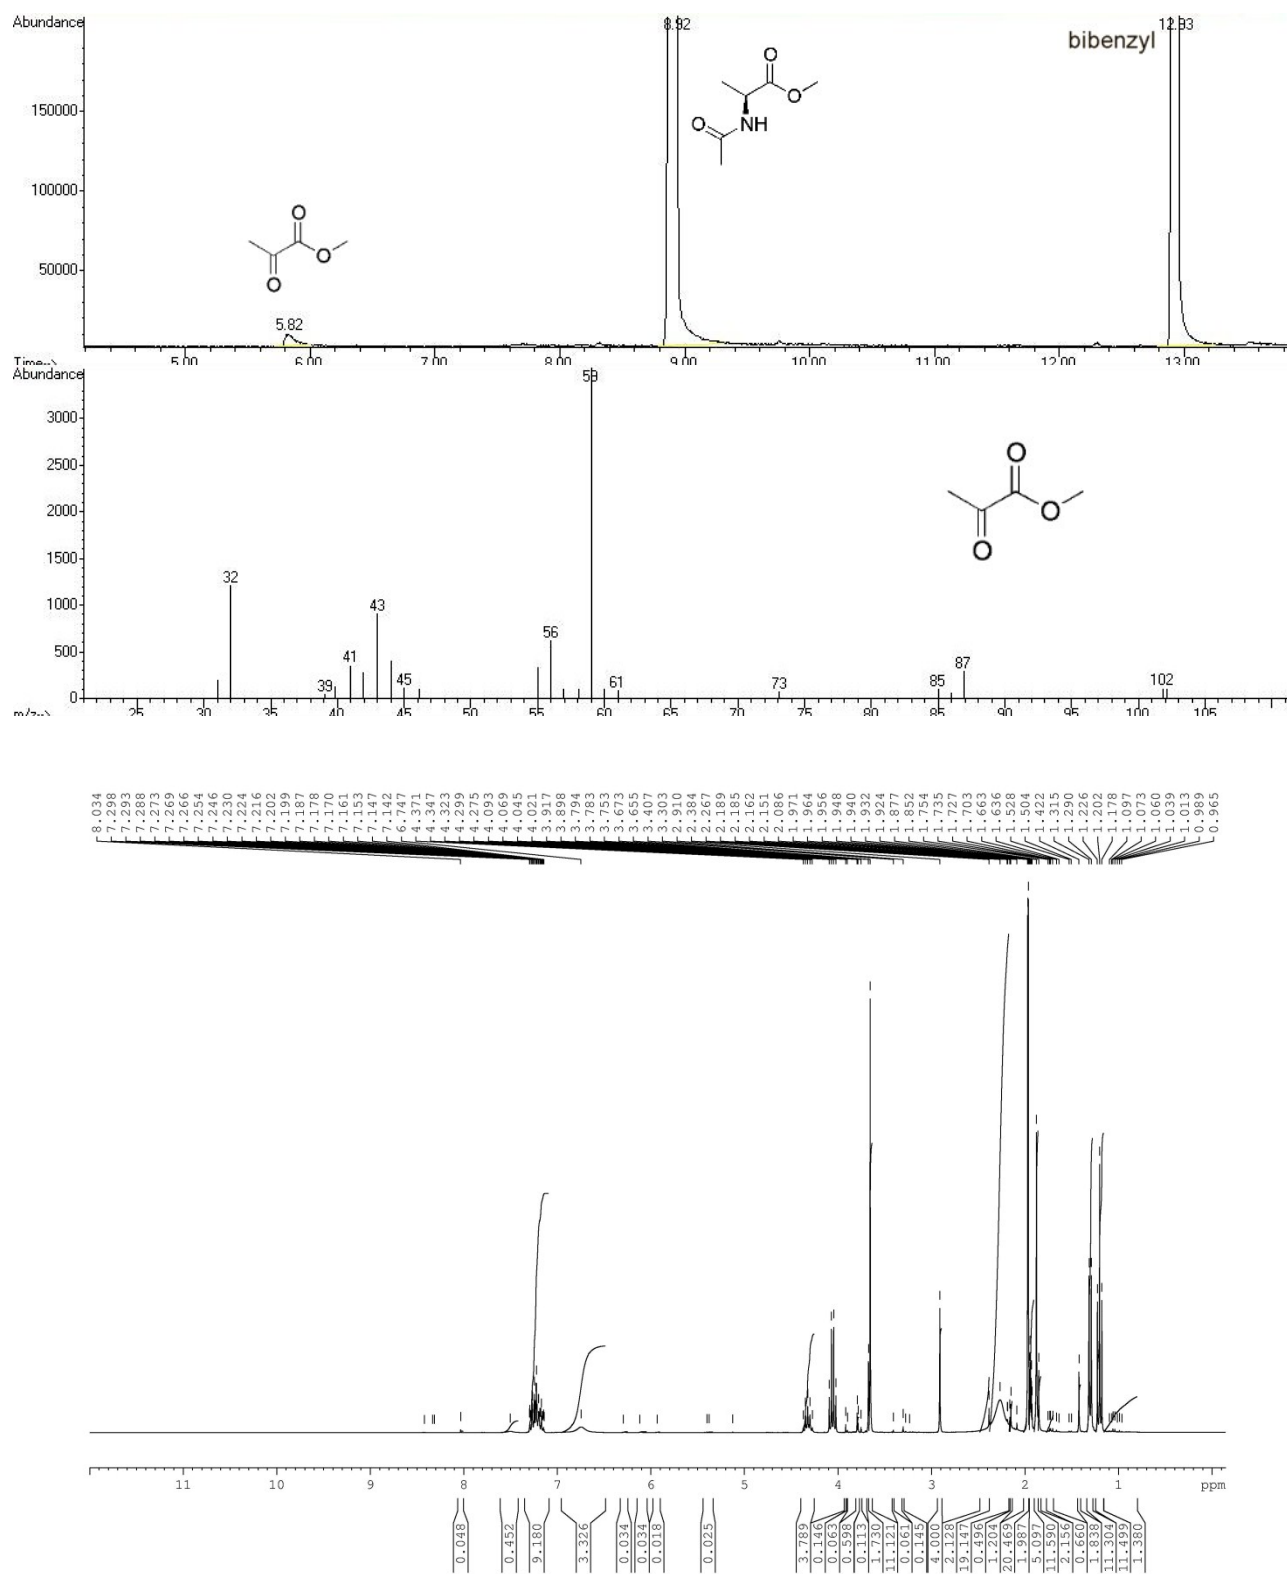

CDCl<sub>3</sub> (300 MHz)

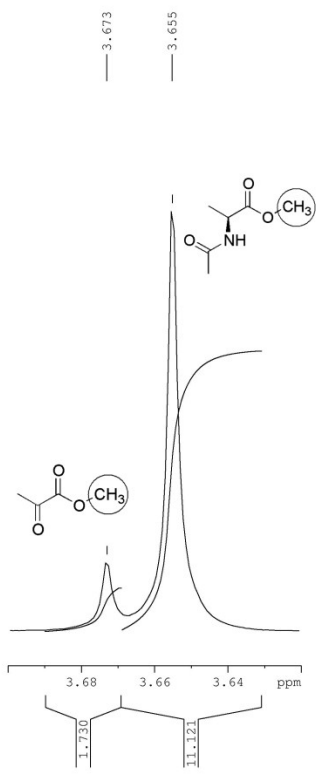

## Oxidation of *N*-AcValOMe (3) with the 1/H<sub>2</sub>O<sub>2</sub> system

See ref. [9] for products identification

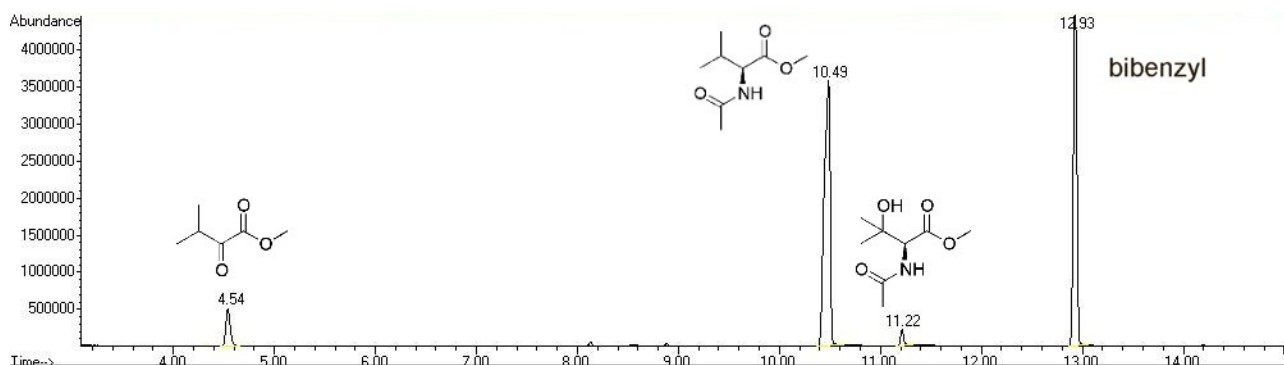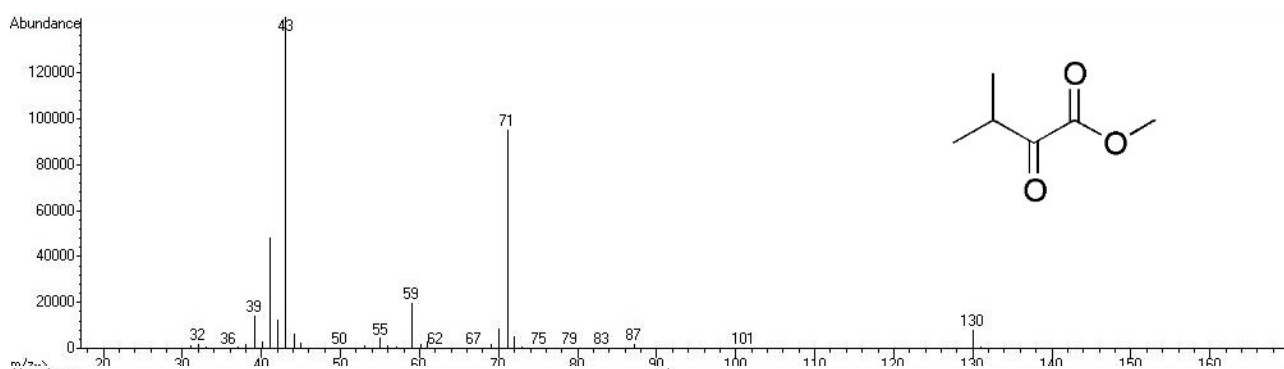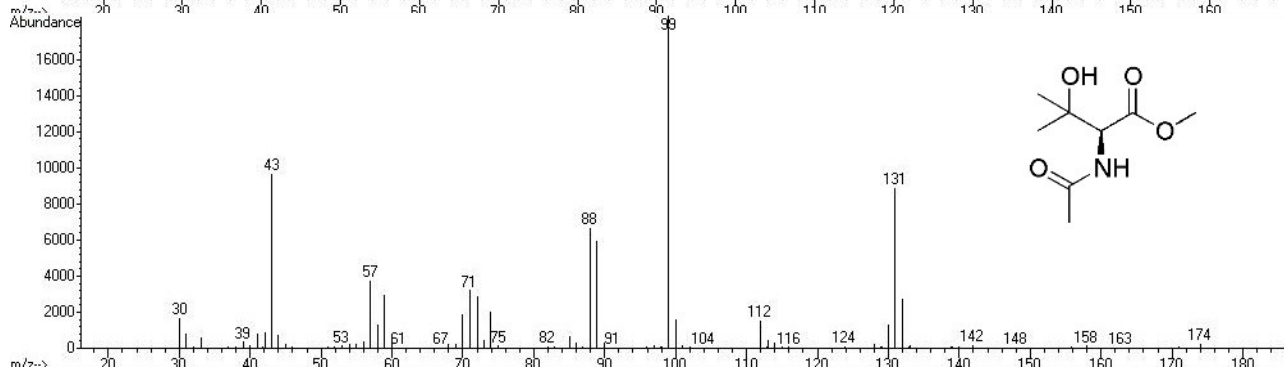

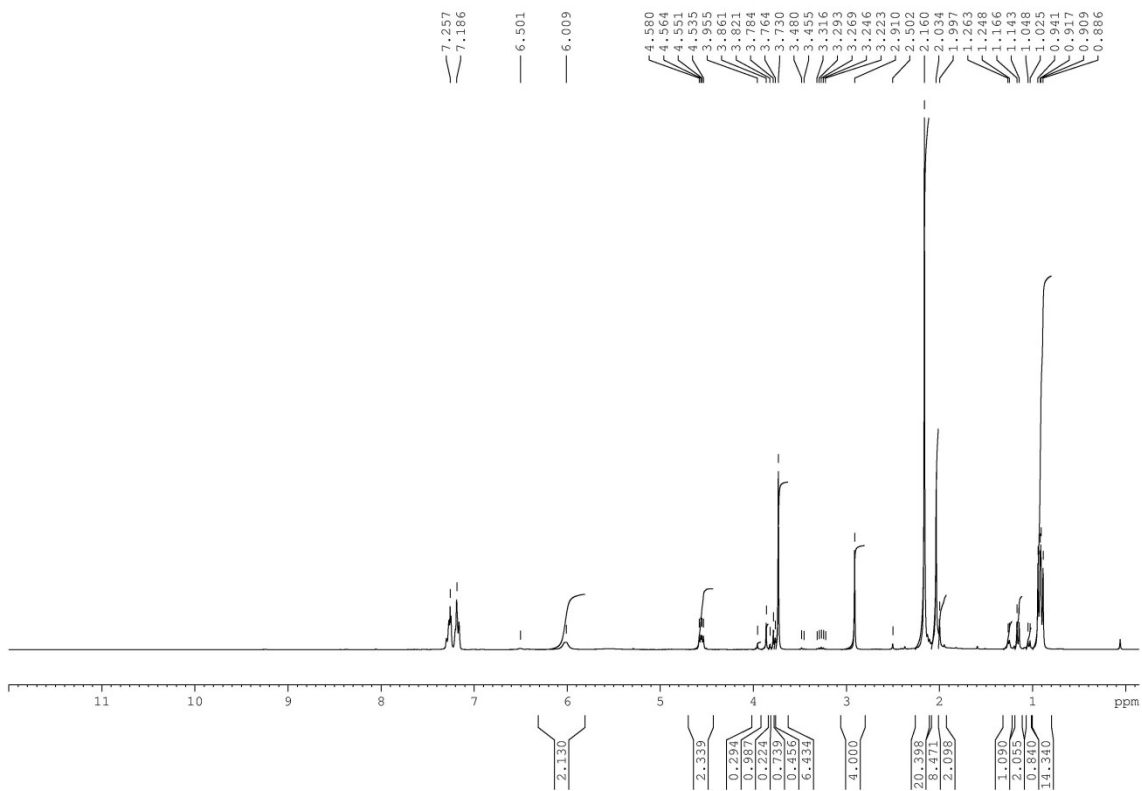

CDCl<sub>3</sub> (300 MHz)

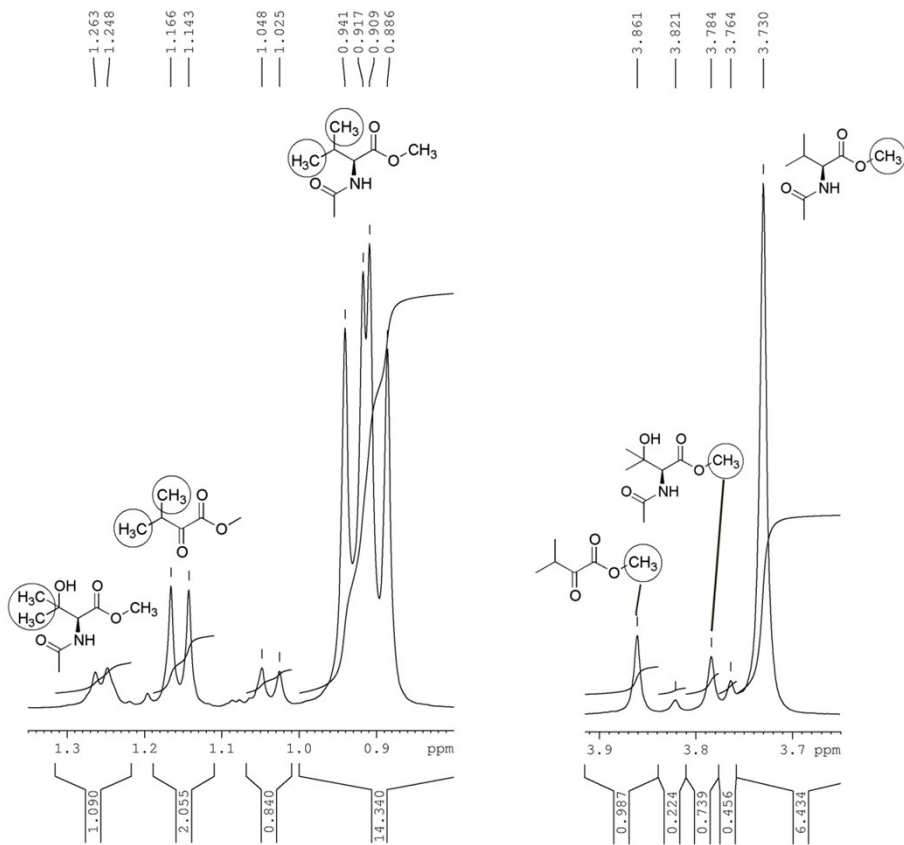



## Oxidation of *N*-AcLeuOMe (4) with the 1/H<sub>2</sub>O<sub>2</sub> system

See refs. [9a,9c,10] for products identification

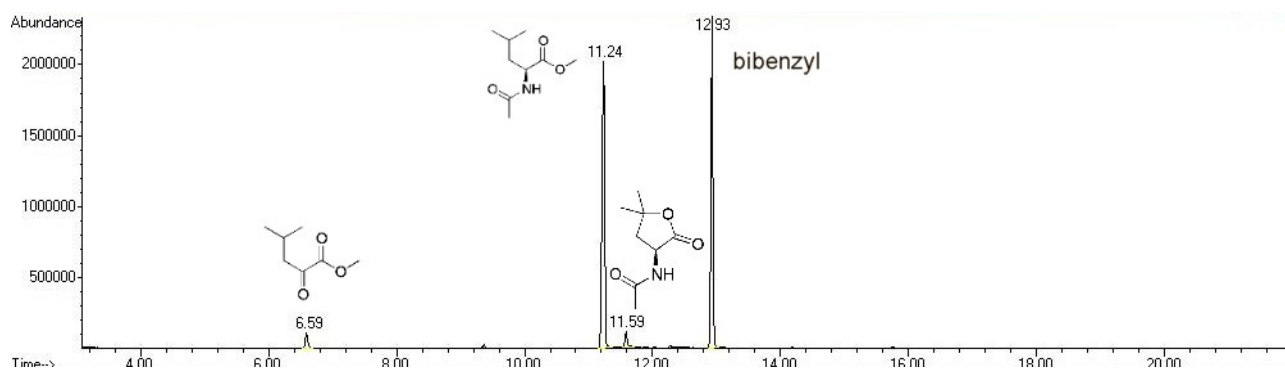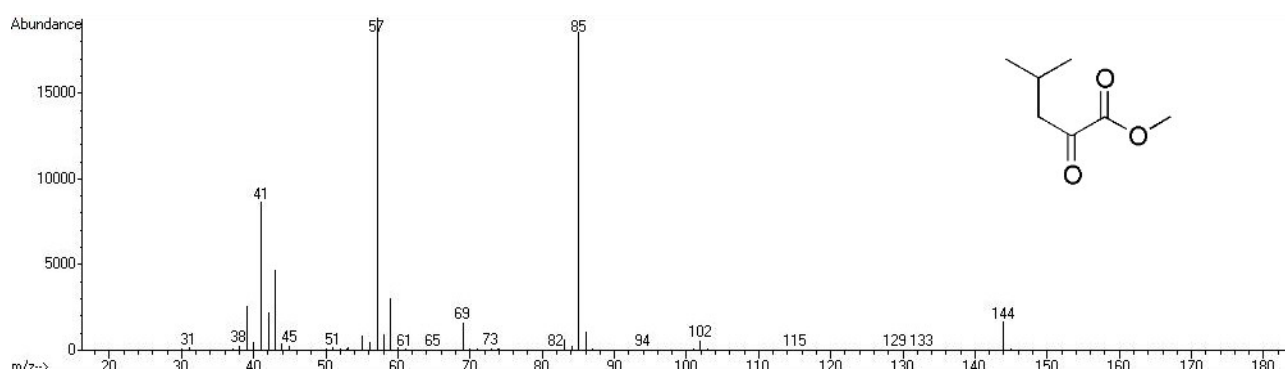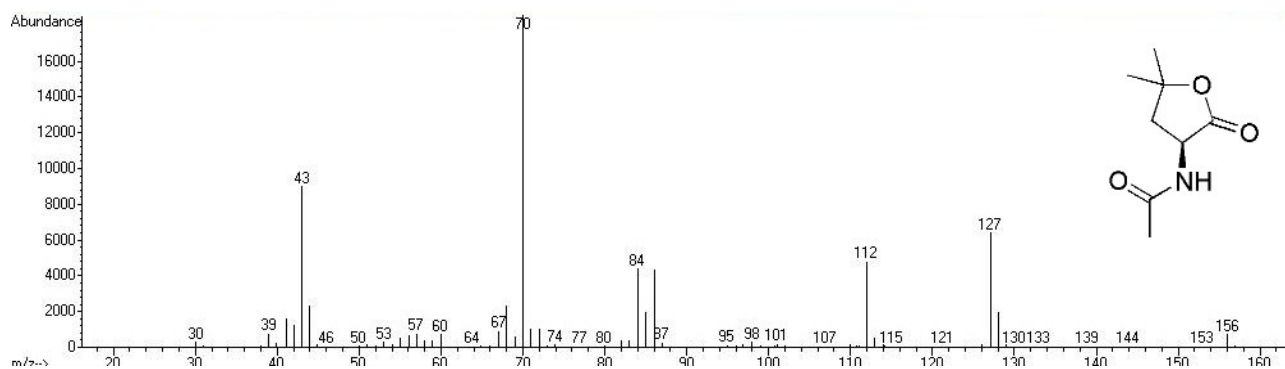

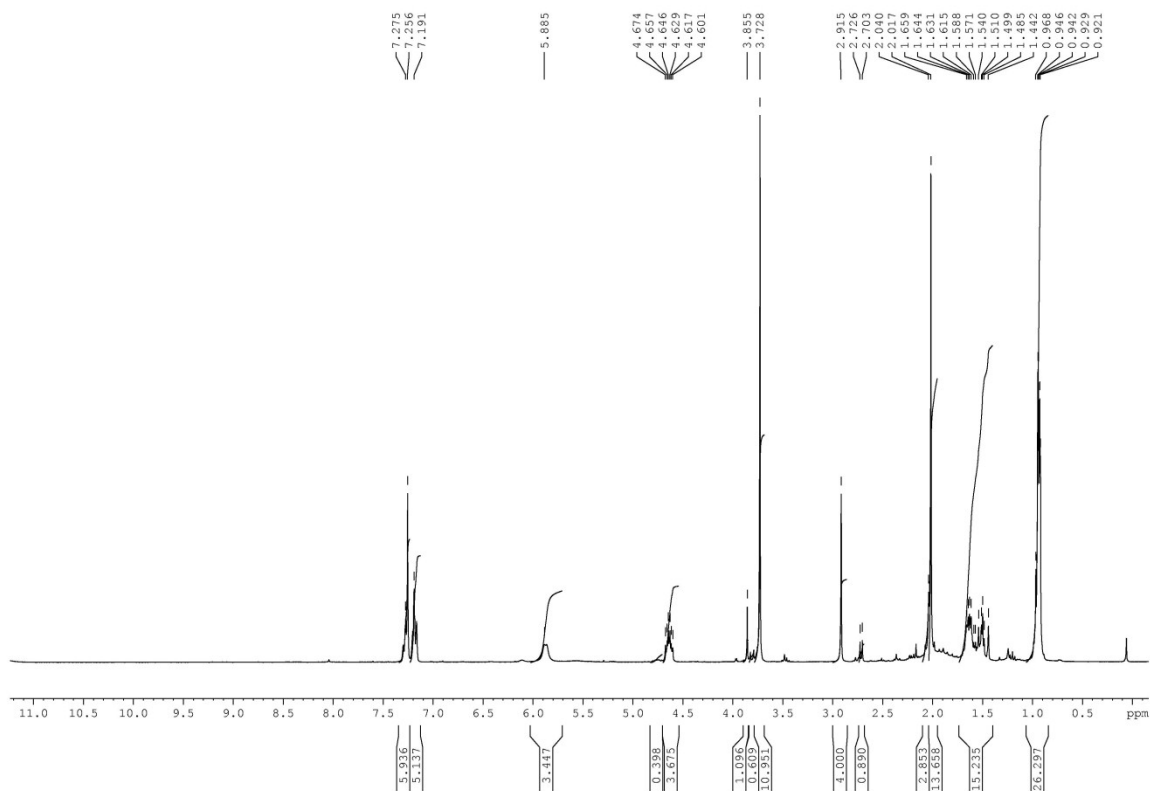

CDCl<sub>3</sub> (300 MHz)

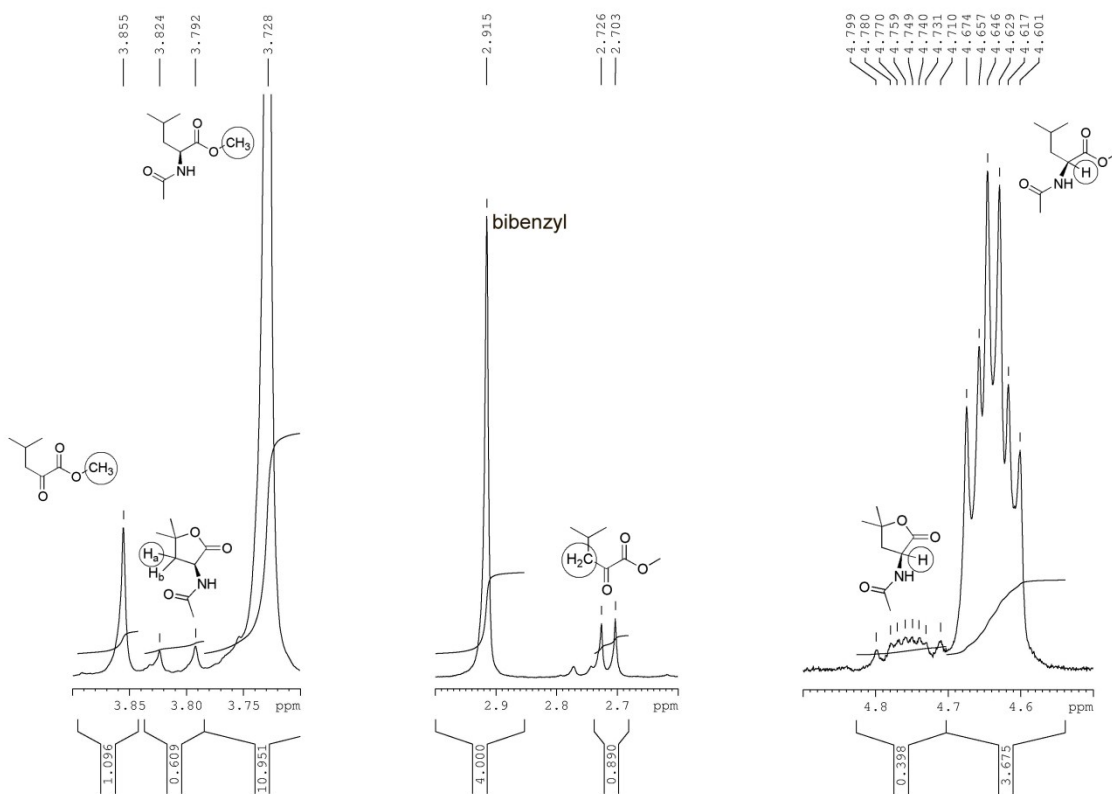

## Oxidation of *N*-AcProOMe (5) with the 1/H<sub>2</sub>O<sub>2</sub> system

See ref. [11] and [3] for products identification

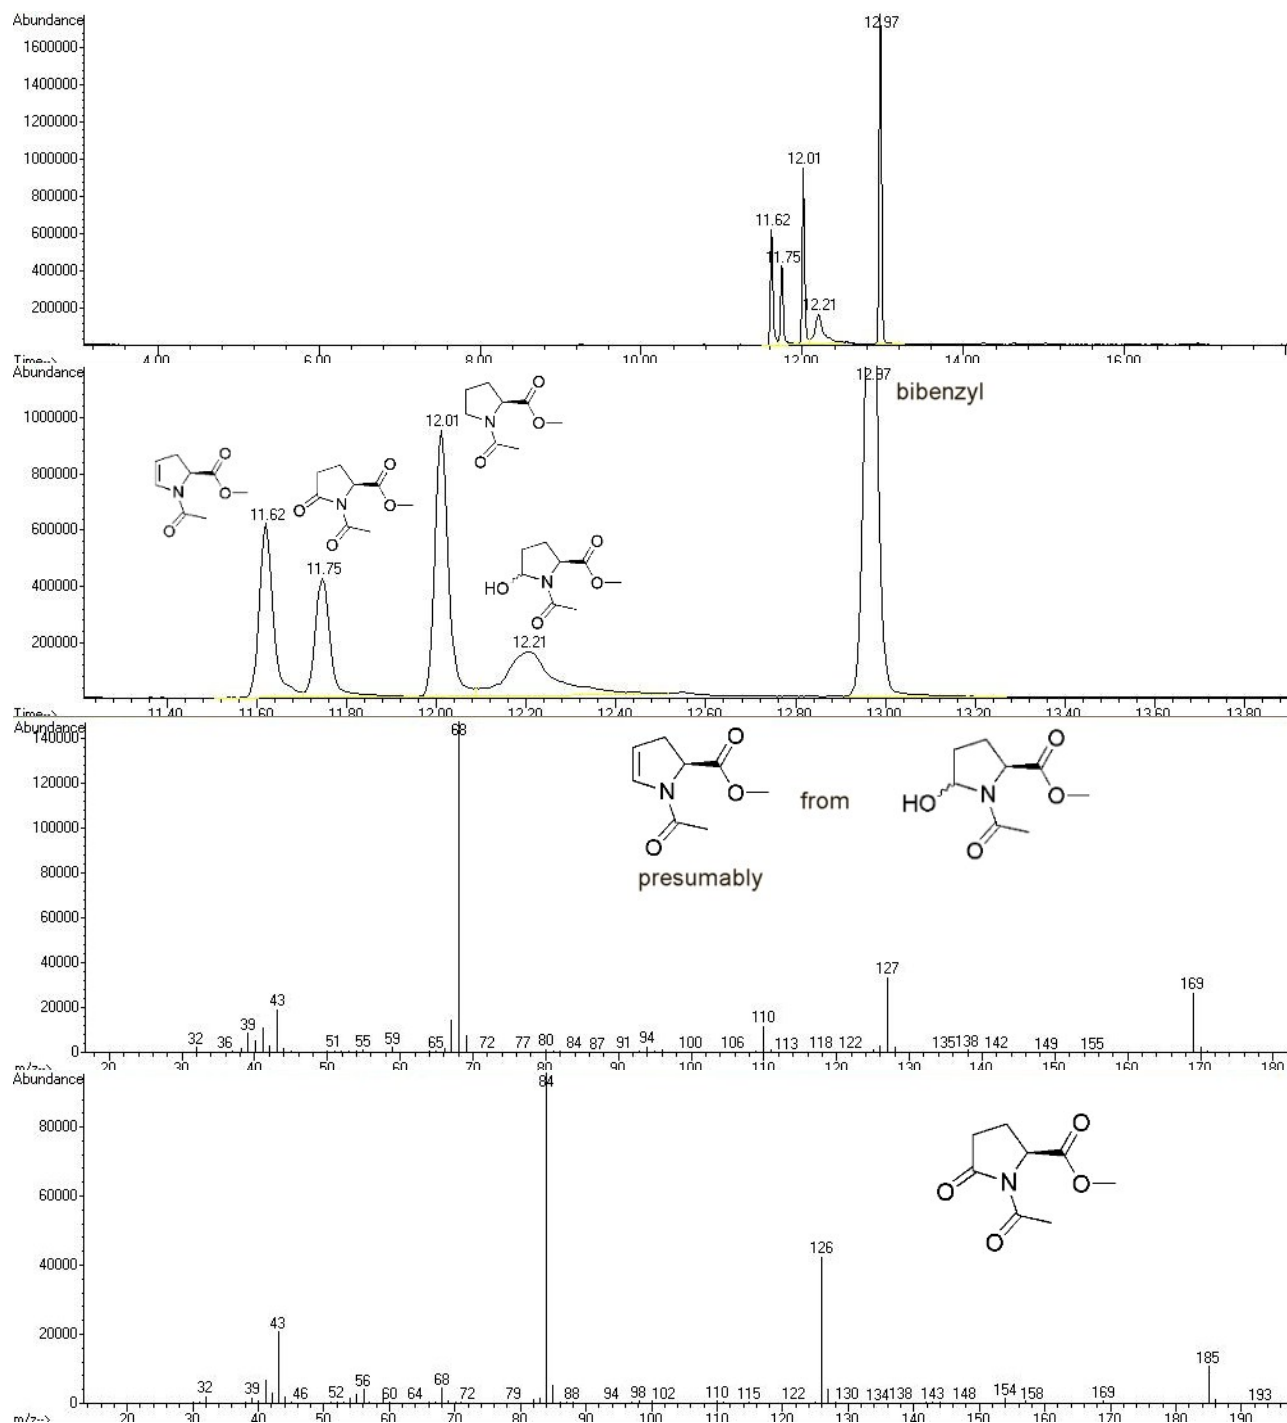

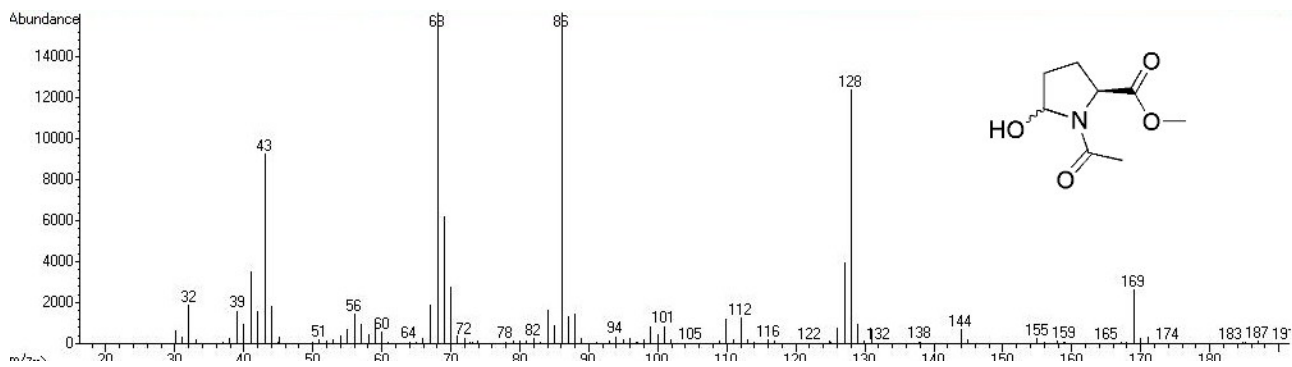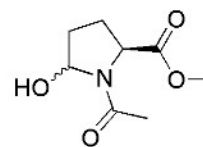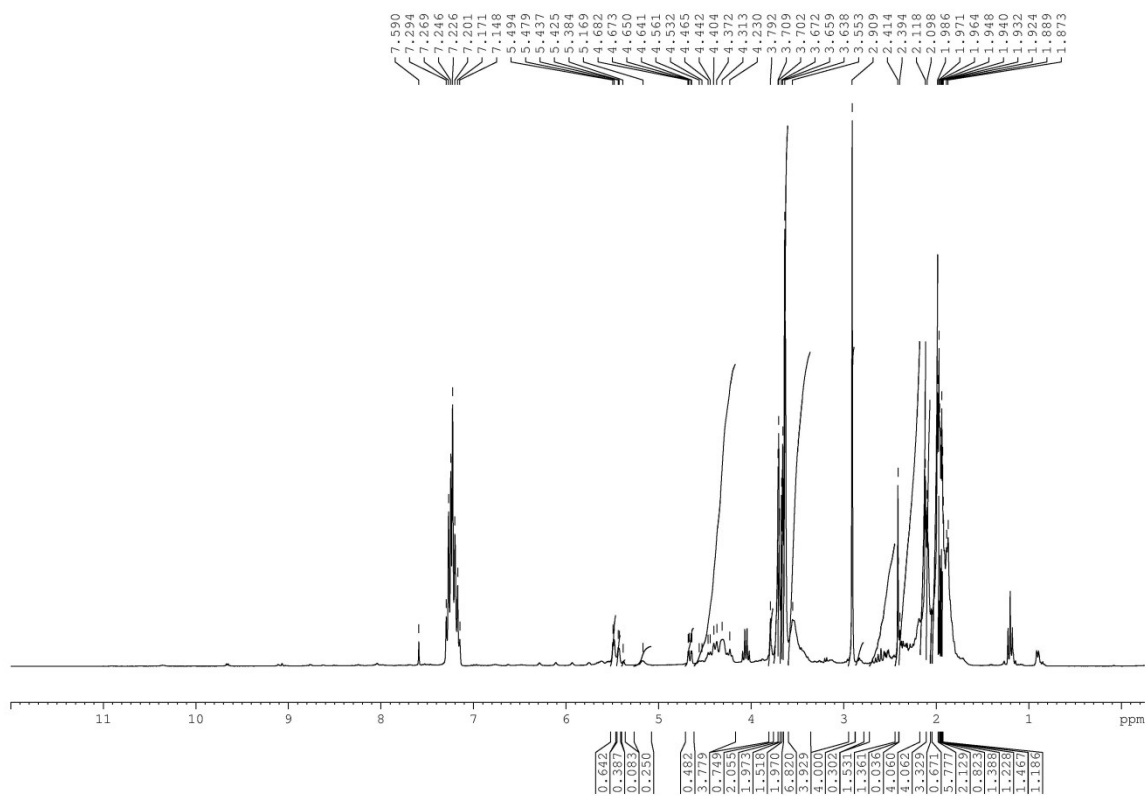

CDCl<sub>3</sub> (300 MHz)

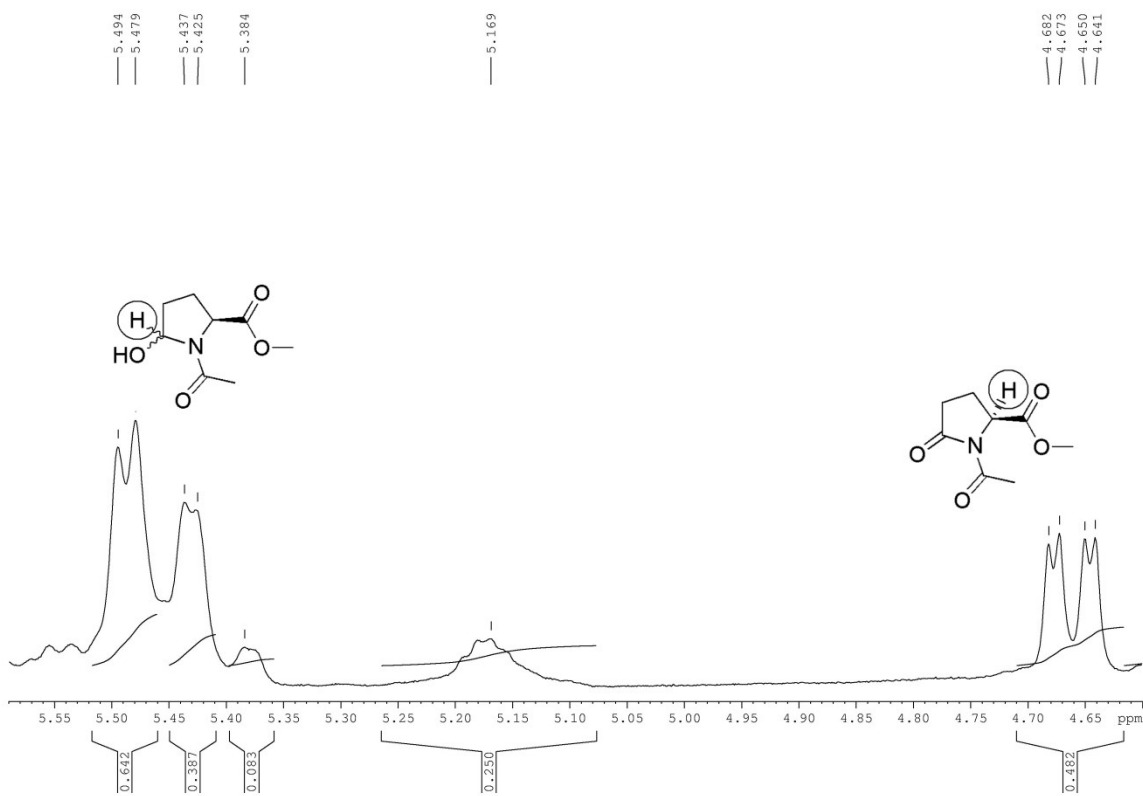

## Oxidation of *N*-AcTrpOMe (6) with the 1/H<sub>2</sub>O<sub>2</sub> system

See ref. [12] for products identification

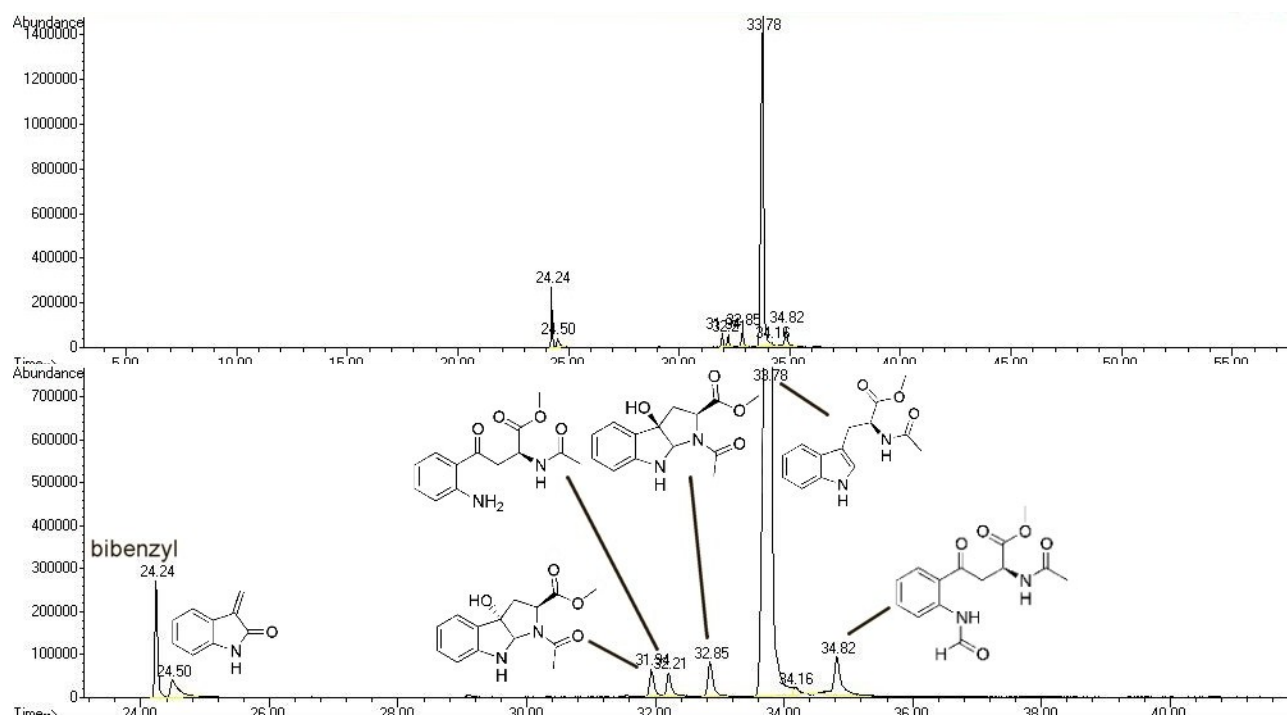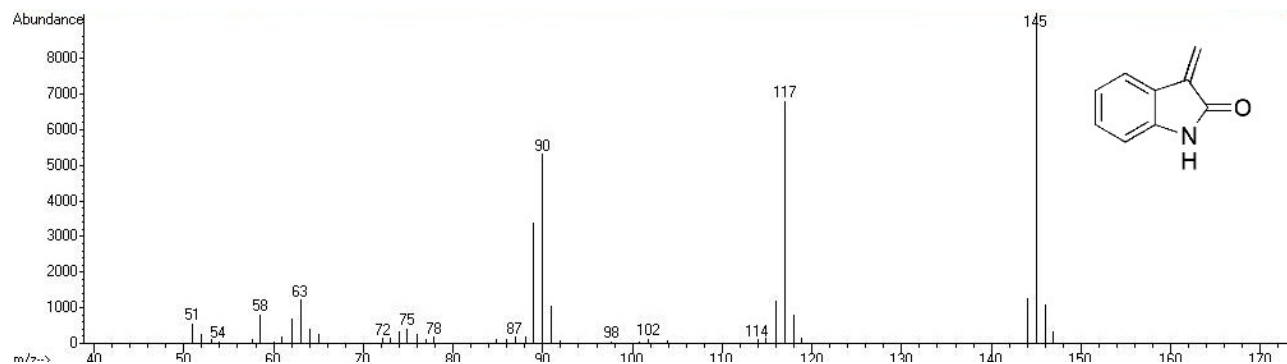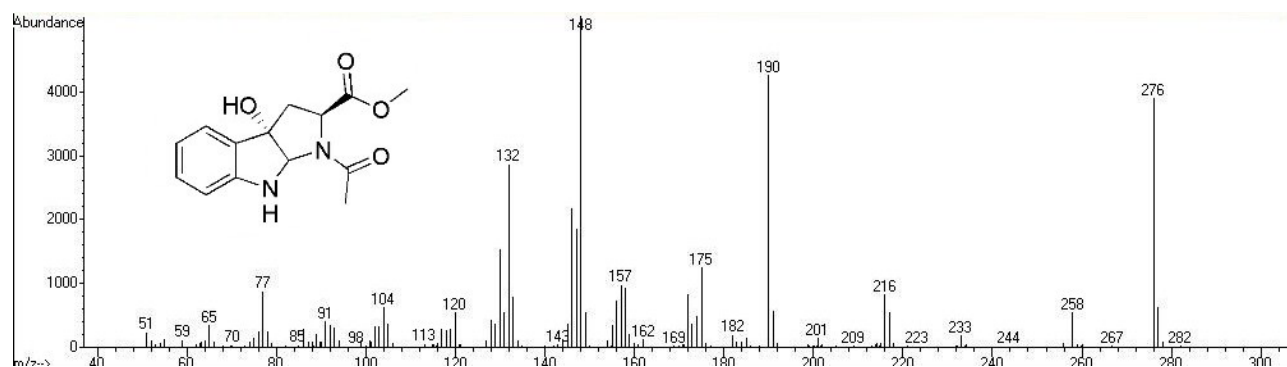

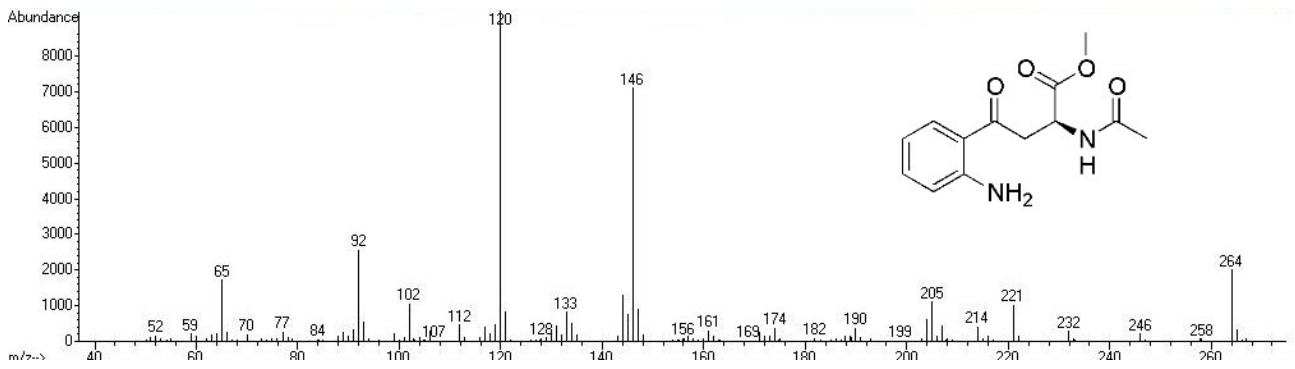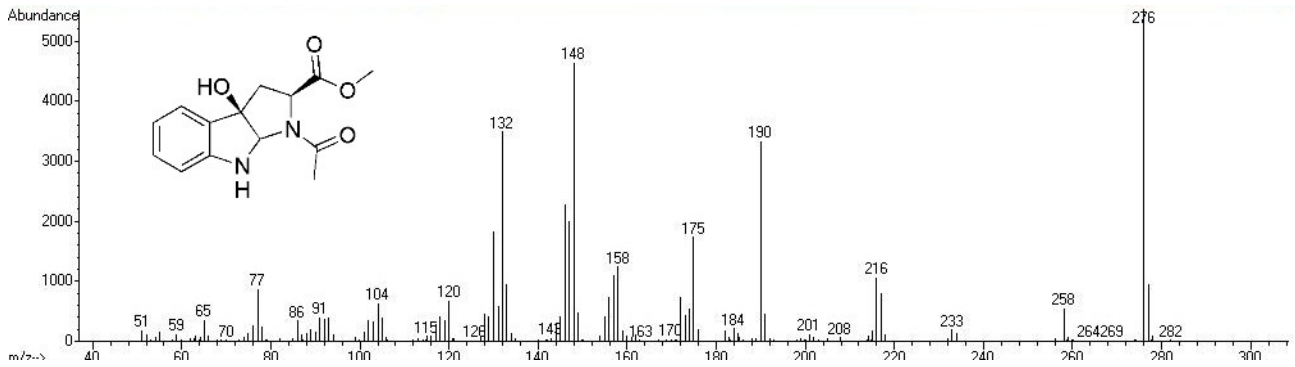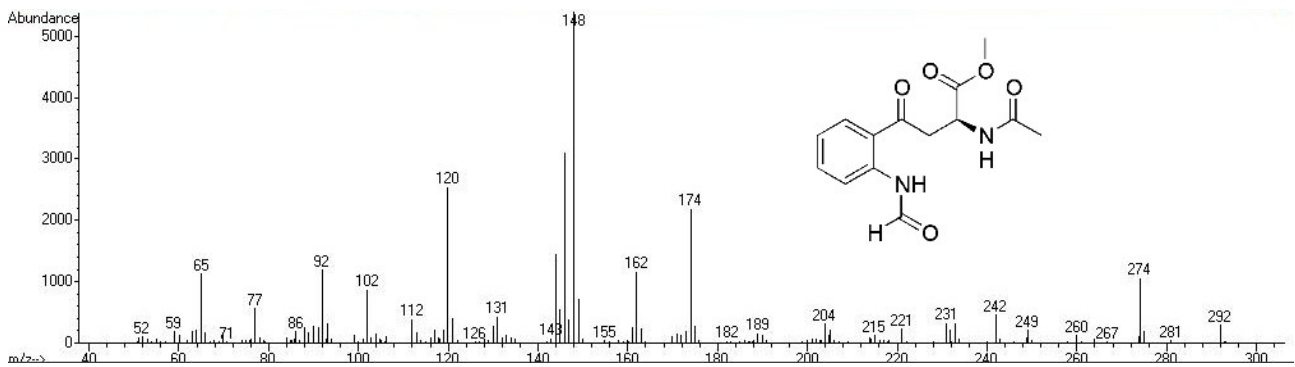

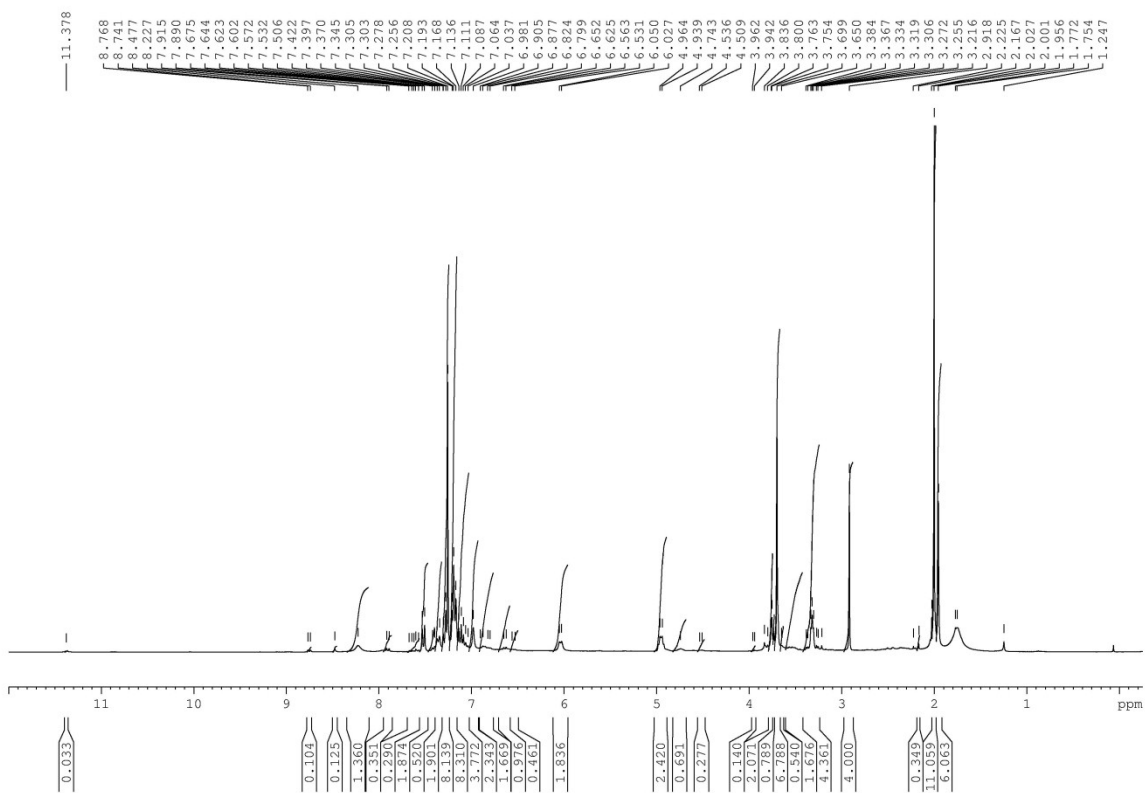

CDCl<sub>3</sub> (300 MHz)

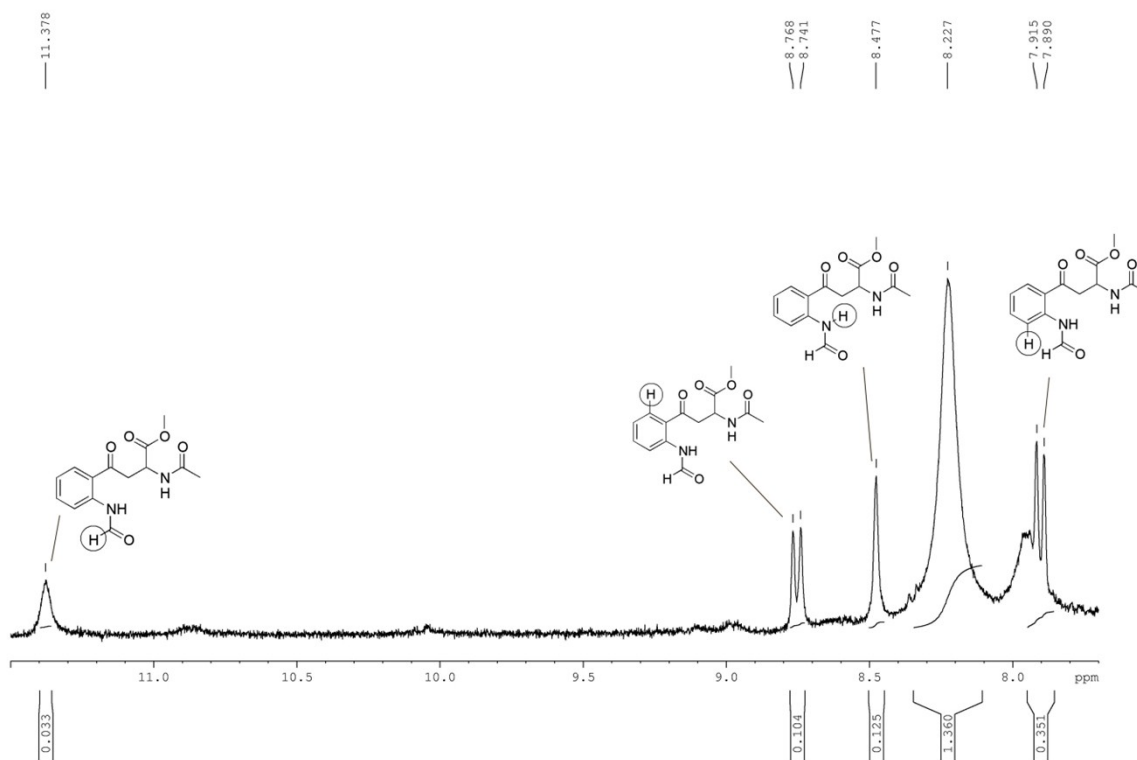



## Oxidation of *N*-AcPheOMe (7) with the 1/H<sub>2</sub>O<sub>2</sub> system

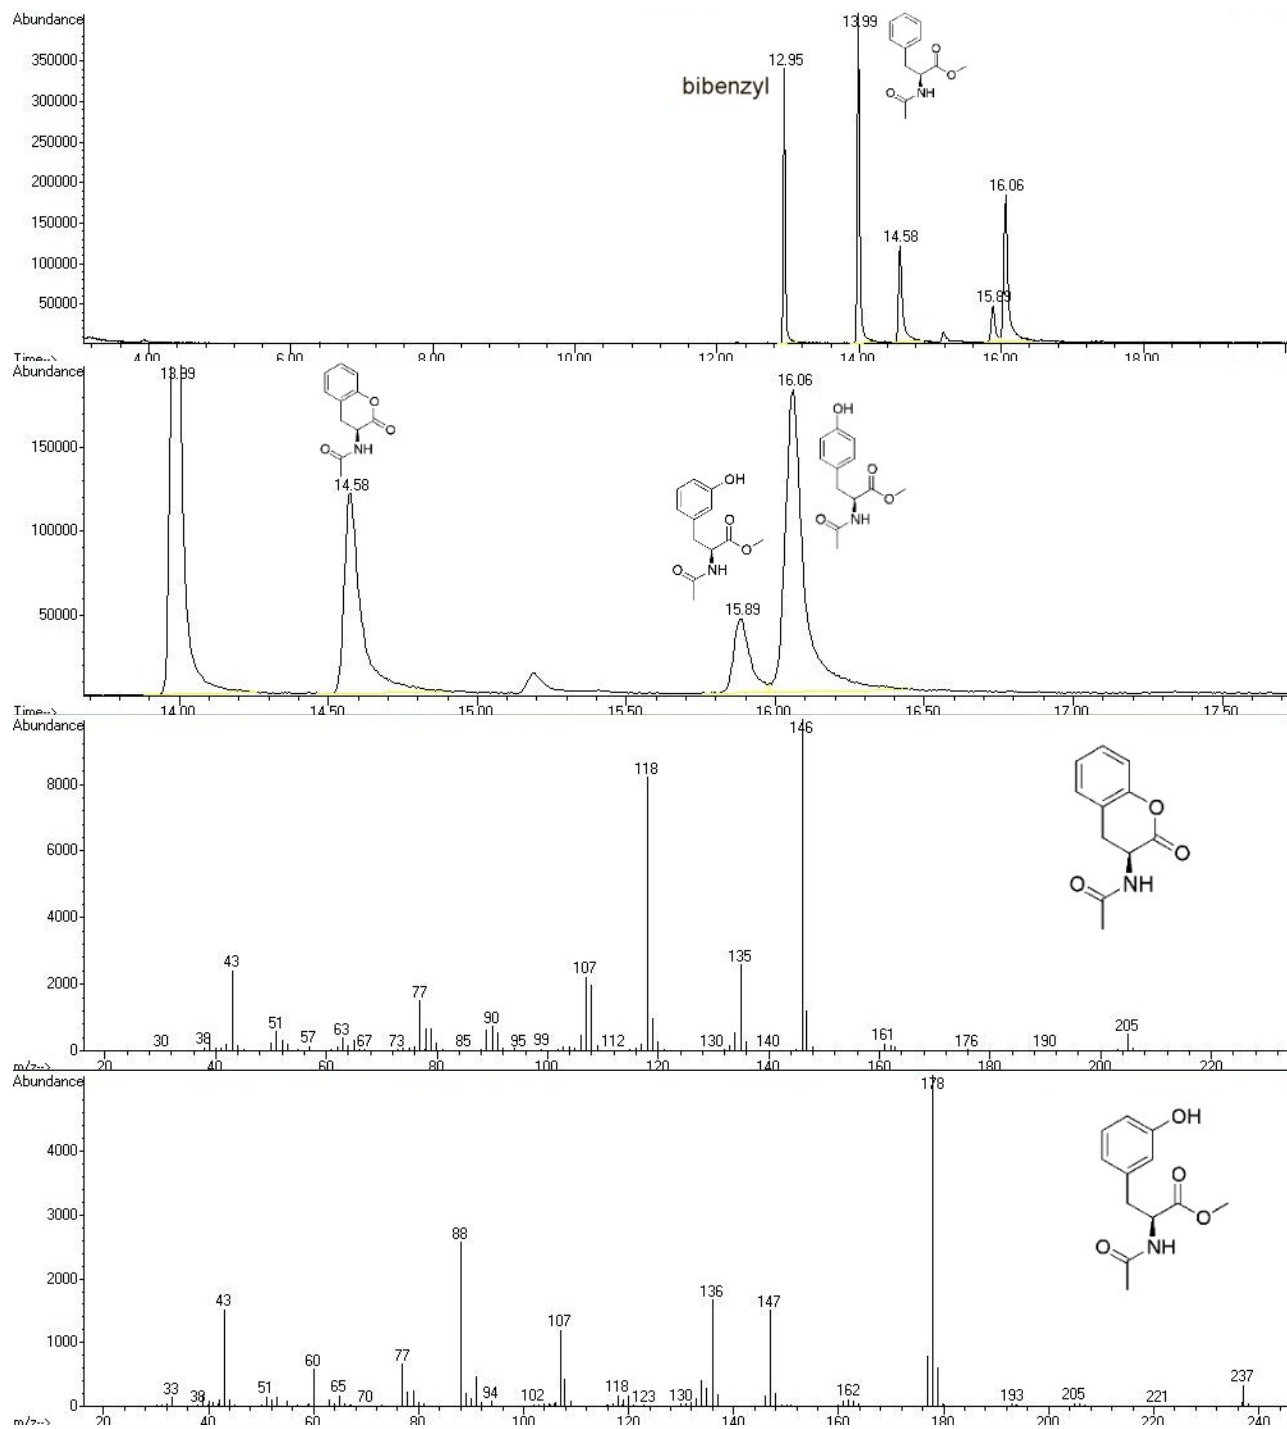

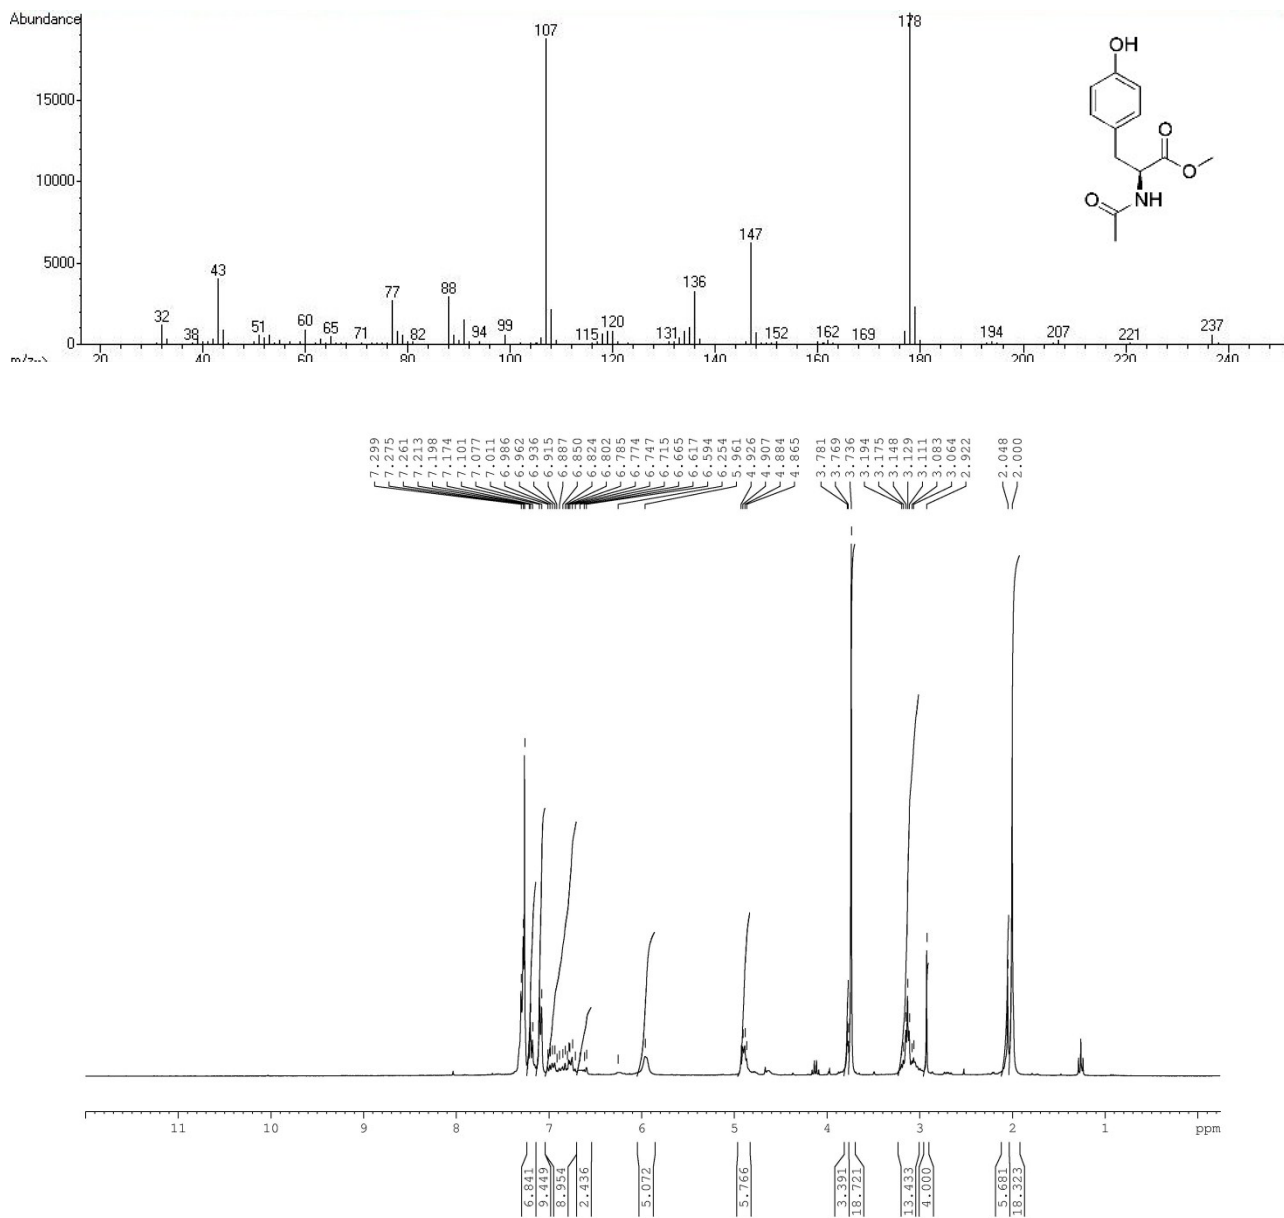

CDCl<sub>3</sub> (300 MHz)

**(2S)-N-acetyl-o-hydroxyphenylalanine methyl ester**

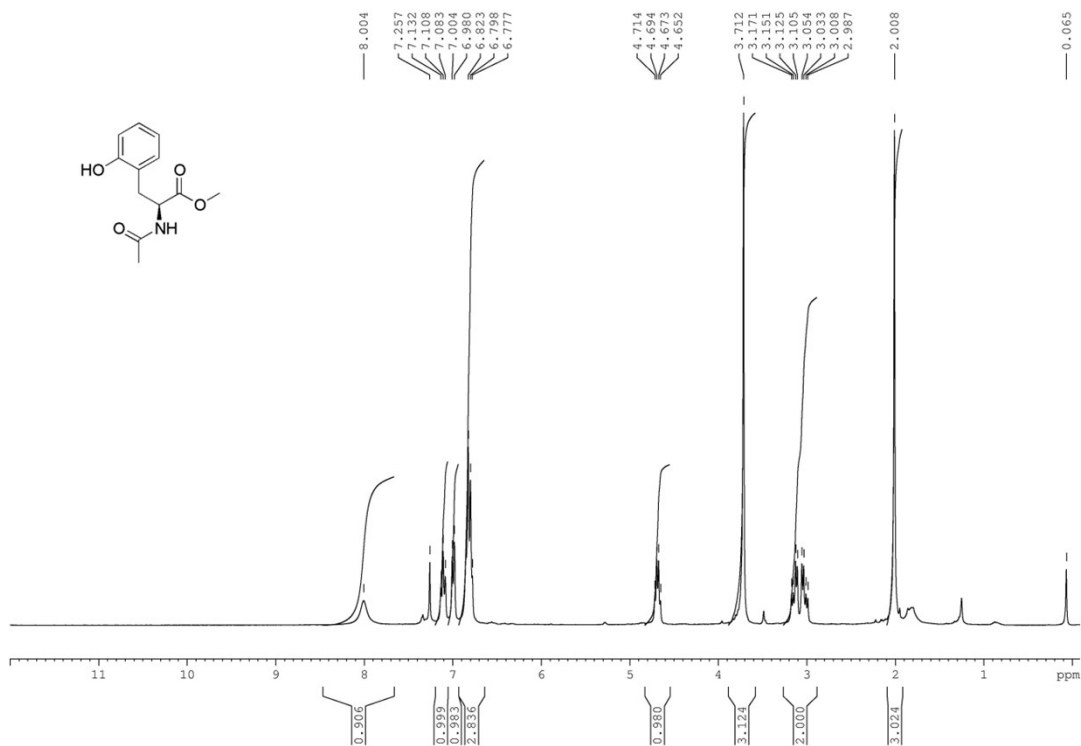

CDCl<sub>3</sub> (300 MHz)

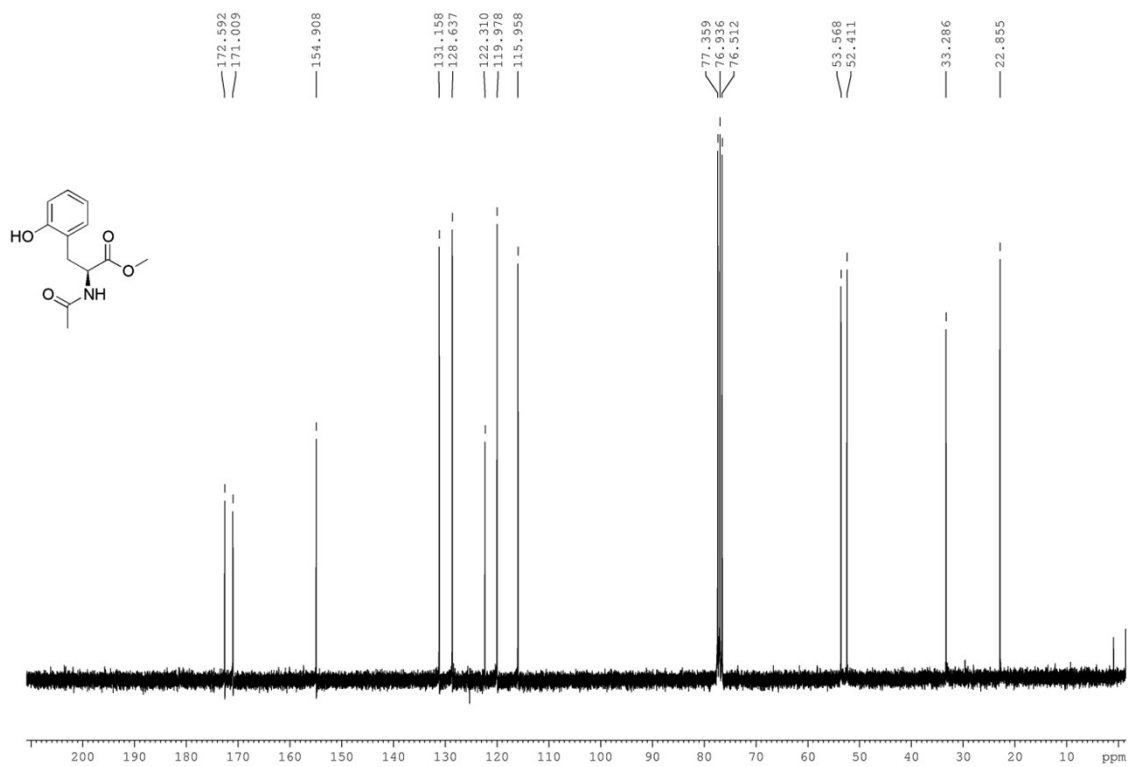

CDCl<sub>3</sub> (75 MHz)

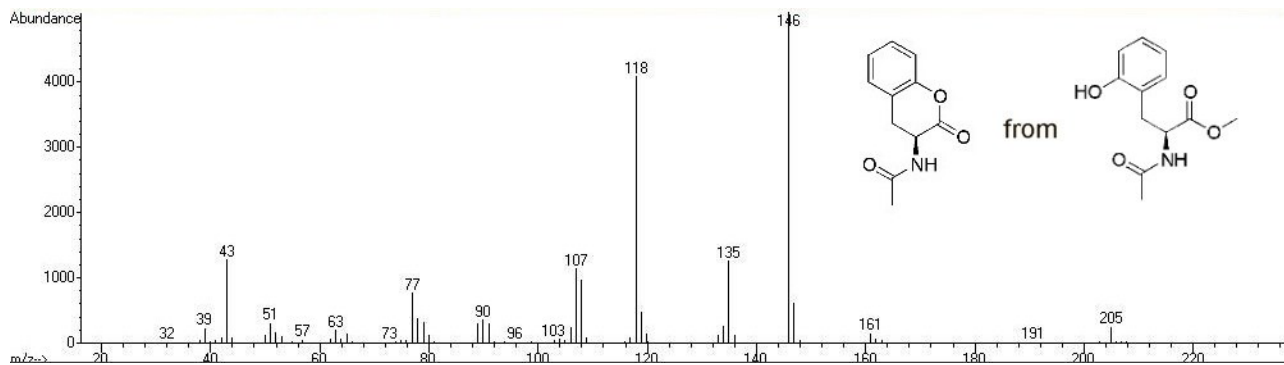

GC-MS (70 eV):  $m/z$  (rel. intensity) = 43(23); 77(14); 107(22), 108(19); 118(79); 135(24); 146(100); 147 (11), 205( $M^+$ , 5).

## References

- 1 R. De Marco, M. L. Di Gioia, A. Leggio, A. Liguori, M. C. Viscomi, *Eur. J. Org. Chem.* 2009, **22**, 3795-3800.
- 2 I. Duttagupta, D. Misra, S. Bhunya, A. Paul, S. Sinha, *J. Org. Chem.* 2015, **80**, 10585-10604.
- 3 K. Irie, A. Ishida, T. Nakamura, T. Oh-Ishi, *Chem. Pharm. Bull.* 1984, **32**, 2126-2139.
- 4 A. J. Reay, T. J. Williams, I. J. S. Fairlamb, *Org. Biomol. Chem.* 2015, **13**, 8298-8309.
- 5 C.-X. Gu, Q.-W. Bi, C.-K. Gao, J. Wen, Z.-G. Zhao, Z. Chen, *Org. Biomol. Chem.* 2017, **15**, 3396-3400.
- 6 J. P. J. Marais, I. Mueller-Harvey, E. V. Brandt, D. Ferreira, *J. Agric. Food Chem.* 2000, **48**, 3440-3447.
- 7 A. J. Pearson, P. R. Bruhn, *J. Org. Chem.* 1991, **56**, 7092-7097.
- 8 Y.-G. Si, J. Chen, F. Li, J.-H. Li, Y.-J. Qin, B. Jiang, *Adv. Synth. Catal.* 2006, **348**, 898-904.
- 9 a) S. Tahara, J. Mizutani, *Agr. Biol. Chem.* 1975, **39**, 71-76. b) Y. Endo, K. Shudo, a. Itai, M. Hasegawa, S. I. Sakai, *Tetrahedron*, 1986, **42**, 5905-5924. c) M. R. Rella, P. G. Williard *J. Org. Chem.* 2007, **72**, 525-531.
- 10 S. Thiede, P. R. Wosniok, D. Herkommer, T. Debnar, M. Tian, T. Wang, M. Schrempp, D. Menche, *Chem. Eur. J.* 2017, **23**, 3300-3320.
- 11 a) S. Yoshifuji, K. I. Tanaka, T. Kawai, V. Nitta, *Chem. Pharm. Bull.* 1985, **33**, 5515-5521. b) K. Drauz, A. Kleemann, J. Martens, P. Scherberich, *J. Org. Chem.* 1986, **51**, 3494-3498.
- 12 a) S. E. V. Bell, R. F. C. Brown, F. W. Eastwood, J. M. Horvath, *Aust. J. Chem.* 2000, **53**, 183-190. b) M. Nakagava, S. Kato, S. Kataoka, S. Kodato, H. Watanabe, H. Okajima, B. Witkop, B. *Chem. Pharm. Bull.* 1981, **29**, 1013-1026. c) C. Goeschen, N. Wibowo, J. M. White, U. Wille, *Org. Biomol. Chem.* 2011, **9**, 3380-3385.
